1  
2  
3  
4  
5  
6  
7  
8  
9  
10  
11  
12  
13  
14  
15  
16  
17  
18  
19  
20  
21  
22

**Heterogeneous Dynamics and Mechanisms of Primary Cilium Disassembly  
in Mammalian Cells**

**Mary Mirvis<sup>1</sup>, Kathleen Siemers<sup>1,2</sup>, James Nelson<sup>1,2</sup>, Tim Stearns<sup>2,3</sup>**

**<sup>1</sup>Departments of <sup>1</sup>Molecular and Cellular Physiology, <sup>2</sup>Biology, and <sup>3</sup>Genetics,  
Stanford University, Stanford, CA, 94305**

Corresponding author:  
Tim Stearns  
Dept. of Biology  
Stanford University  
Stanford, CA 94305-5020  
(650) 725-6934  
stearns@stanford.edu

23 **Abstract**

24 The primary cilium is an important regulator of signaling pathways in cell proliferation and  
25 differentiation. Mechanisms involved in cilium assembly and homeostasis are well described, but  
26 little is known about mammalian ciliary disassembly, which is required for cell cycle  
27 progression. We examined whether cilia disassembly in cultured mouse cells occurred by  
28 resorption into the cell or extracellular shedding. Live cell imaging of individual disassembly  
29 events revealed dynamic and heterogeneous behaviors, with rates varying by several orders of  
30 magnitude. Surprisingly, seconds-fast disassembly was the predominant method of cilium loss  
31 (83% of events), and we demonstrate that this is due to ciliary shedding. We tested the roles of  
32 candidate regulators of ciliary shedding, katanin and intracellular calcium. Katanin  
33 overexpression increased seconds-fast disassembly, and katanin and intracellular calcium levels  
34 independently, but not synergistically, reduced cilia length. This work provides new, detailed  
35 insights into mechanisms of primary ciliary disassembly in mammalian cells.

36

## 37 **Introduction**

38  
39 Eukaryotic cilia and flagella are highly conserved organelles adapted to facilitate the interaction  
40 of cells with the surrounding environment. Many types of cilia are found in a wide diversity of  
41 organisms, tissues and cell types, with variable structural features underlying specific functions.  
42 Nevertheless, all cilia and flagella share a common structure consisting of a mature centriole (a  
43 basal body in this context), which nucleates a core of stable microtubule doublets (the axoneme),  
44 encased in a ciliary membrane distinct in composition from the plasma membrane. Contact  
45 between the basal body/axoneme and plasma membrane occurs near the base of the cilium at the  
46 transition zone, which is thought to segregate the ciliary compartment from the cytoplasm,  
47 thereby maintaining a specific population of proteins in the cilium (1–3).

48         The primary cilium occurs in single copy per cell in most vertebrate tissues, where it  
49 receives and transduces mechanical and molecular signals. In this role, primary cilia are essential  
50 for coordinating proliferative, metabolic, and developmental signaling pathways including  
51 Hedgehog, Receptor Tyrosine Kinase (RTK) growth factors (PDGF, TGF- $\beta$ , IGF), GPCRs, and  
52 non-canonical Wnt(4–6). Furthermore, the primary cilium itself may contribute to cell cycle  
53 regulation (7–10). The importance of normal ciliary function is underscored by the diverse  
54 phenotypes associated with ciliopathies, developmental syndromes that occur when ciliary  
55 structure, function, or regulation are defective (11–13).

56         Primary cilia are closely intertwined with the cell cycle. In most proliferating animal  
57 cells, the primary cilium forms in G<sub>0</sub>/G<sub>1</sub> and is disassembled prior to M-phase, releasing the  
58 centrioles to associate with the mitotic spindle (7,14). Cilium disassembly is linked to cell cycle  
59 progression and failure to disassemble the cilium is associated with defects in S-phase (7,15–17)  
60 and mitotic progression (18–21). Thus the primary cilium is not only dependent on cell cycle

61 cues for assembly and disassembly, but also the state of the cilium has direct consequences on  
62 cell cycle progression (19,21,22).

63 Ciliary disassembly typically occurs in S or G2. Several cell cycle-associated regulators  
64 of ciliary disassembly have been identified (23–26). Notably, mitotic kinase Aurora A (and its  
65 homolog CALK in *Chlamydomonas*) activates a phosphorylation cascade required for ciliary  
66 disassembly and mitotic progression (19,21,27–32). A proposed mechanism is that the  
67 downstream target of Aurora A, the microtubule deacetylase HDAC6, deacetylates stable  
68 microtubules of the axoneme, thus destabilizing the axoneme and preparing it for subsequent  
69 disassembly, perhaps involving the IFT machinery or microtubule depolymerizing kinesins  
70 (30,33,34). Although there is little evidence for this mechanism in mammalian cells, it is  
71 consistent with a mechanism for flagellar disassembly in the unicellular green alga  
72 *Chlamydomonas*, in which cells gradually and simultaneously resorb their two flagella, defined  
73 as internalization of the axoneme and retention of the majority of the ciliary membrane  
74 (28,29,35–38).

75 Alternatively, cilia could be removed very rapidly by extracellular shedding, defined as  
76 concurrent release of membrane and axoneme from the cell body, which has also been referred to  
77 as ciliary excision, deciliation, deflagellation, or flagellar autotomy (39,40). Ciliary shedding has  
78 been observed in several ciliated protozoan species, particularly *Chlamydomonas* (40).  
79 Mammalian primary cilia have been observed to undergo pharmacologically-induced shedding  
80 (41), and release of a small distal portion of the primary ciliary membrane has been reported in  
81 several contexts (42–44), but the relevance of either of these events to whole cilium loss is  
82 unknown.

83 Here, we examined ciliary disassembly dynamics in mouse IMCD3 (inner medullary  
84 collecting duct) cells by high resolution, live-cell 3D confocal microscopy. Ciliary disassembly  
85 behaviors were remarkably dynamic and heterogeneous, and occurred on time scales ranging  
86 from seconds to hours, which we separated into 3 categories (*gradual*, *instant*, and *combined*) of  
87 which the fastest ( $10^1$   $\mu\text{m}/\text{min}$ ; *instant*) comprised >80% of events and involved cilium shedding.  
88 We showed that katanin and intracellular calcium, two candidate regulators of ciliary shedding,  
89 independently, but not synergistically, negatively regulated cilia disassembly.

90

## 91 **Results**

### 92 **Ciliary structures in cells undergoing serum-induced cilium disassembly**

93 We manipulated serum level in mammalian cell culture medium to synchronize the presence of  
94 primary cilia in IMCD3 cells (21,45) expressing a fluorescent ciliary membrane marker (IMCD3-  
95 SSTR3::GFP) (46). The axoneme in these cells was visualized by immunostaining for acetylated  
96 tubulin (acTub), and the basal body by staining for pericentrin (PCNT) (Fig. 1A, S1A). We found  
97 that  $60 \pm 9.09\%$  of serum starved cells at 0 hour and 6 hours were ciliated after serum starvation.  
98 Re-introduction of serum (serum stimulation) over a 6 hour period resulted in a steady loss of cilia  
99 to a level of  $30 \pm 0.4\%$  that was similar to that in asynchronously cycling cells at a comparable  
100 cell density (Fig. 1B). There was also a decrease in mean ciliary length (Fig. S1C). As validation  
101 of serum-induced ciliary disassembly, cells were treated in parallel with  $2 \mu\text{M}$  tubacin an inhibitor  
102 of HDAC6, a microtubule deacetylase required for ciliary disassembly (21,47,48), or the carrier  
103 DMSO as a control. As expected, tubacin treatment prevented the decrease in the percent of  
104 ciliated cells (Fig. 1B) and cilia length (Fig. S1C). Mitotic cells (identified by condensed nuclei  
105 mitotic spindles, separating nuclei in telophase, and cells separated by a midbody) accumulated  
106 following serum stimulation (Fig. S1); this is consistent with an inverse relationship between the

107 presence of a primary cilium and the mitotic status (49–51). As expected, this wave of mitosis  
108 was inhibited or delayed in tubacin-treated cells (Fig. S1B).

109 We identified three types of cilium structures consistent with being disassembly  
110 intermediates in these fixed samples (Fig. 1C-G): 1) a discontinuous axoneme, marked by a gap  
111 in acTub staining (“Discontinuous acTub”, Fig. 1C); 2) a ciliary stub, characterized by a short  
112 (<1 $\mu$ m) cilium positive for both acTub and SSTR3 membrane fluorescence (“acTub+ SSTR3+  
113 Stub”, Fig. 1D); and 3) an axoneme lacking SSTR3 fluorescence, marked by linear acTub  
114 fluorescence (>1 $\mu$ m) adjacent to a PCNT-labeled basal body (“acTub+ SSTR3-”, Fig. 1E). These  
115 structures were rare in serum starved cells, but at 2-3 hrs post-stimulation they comprised the  
116 majority of detectable cilia (Fig. 1F). The enrichment of these structures in post-serum  
117 stimulated cells was inhibited in the presence of tubacin (Fig. 1G), indicating that these  
118 structures are most likely representative of disassembling cilia.

119 The precise disassembly mechanisms represented by these different structures cannot be  
120 determined from static images; however, they illustrate that ciliary disassembly may be  
121 unexpectedly complex, and several distinct disassembly behaviors may occur within a single cell  
122 type.

123

#### 124 **Ciliary disassembly dynamics are heterogeneous and favor instantaneous cilia loss**

125 To observe cilium disassembly directly, we generated IMCD3 cells stably co-expressing markers  
126 of the ciliary membrane (SSTR3-GFP) and basal body (mCherry-PACT). Live cells were imaged  
127 immediately following serum stimulation with full confocal stacks acquired continuously at 45-90  
128 sec intervals for 6-12 hours on a laser scanning confocal microscope. Imaging of cilia in serum  
129 starved cells with cilia that were not disassembling (Fig. 2A.1) revealed several intrinsic features

130 of ciliary dynamics. First, cilia underwent spontaneous length fluctuations on short-term time  
131 scales (up to  $\sim 1.5 \mu\text{m}$  between consecutive time points; Fig. S3A). Second, cilium length on  
132 average decreased slightly over the 12 hour imaging period, with a mean rate of  $\sim 0.005 \mu\text{m}/\text{min}$   
133 ( $n=10$ , Fig. S3A), which may reflect individual cell behavior or response to our long-term  
134 fluorescence imaging regime. These features were taken into account in our analysis of cilium  
135 disassembly.

136 Video sequences of cells in which cilia disassembled during the course of observation,  
137 revealed a striking dynamic range of disassembly behaviors. Further analysis showed that these  
138 behaviors can be grouped into three categories, which we will refer to as *gradual*, *instant*, and  
139 *combined*; these are illustrated in the individual examples shown in Fig. 2A and Movies S1-4. We  
140 define these categories as follows: *gradual* - cilium length reduction over multiple consecutive  
141 time points ultimately leading to terminal cilium loss (e.g., Fig. 2A.2, rate of  $0.016 \mu\text{m}/\text{min}$ );  
142 *instant* - a single discrete event of cilium loss within a single imaging frame, i.e. 30-90 sec (e.g.,  
143 Fig. 2A.3, approximate minimum rate of  $4.72 \mu\text{m}/\text{min}$ ); and *combined* - a period of *gradual*  
144 disassembly directly followed by an *instant* loss event (e.g., Fig. 2A.4, gradual phase with a rate  
145 of  $0.029 \mu\text{m}/\text{min}$ , followed by very rapid loss within 46 sec with an approximate minimum rate of  
146  $5.69 \mu\text{m}/\text{min}$ ). We note that it was usually not possible to visualize the nature of the loss event in  
147 the *instant* cases due to their rapid rate and constraints on the time resolution of long time-scale  
148 live imaging.

149 Our initial characterization of the cilium disassembly categories relied on visual inspection  
150 of video sequences (Fig S2). To achieve a more objective analysis of disassembly, we developed  
151 a Matlab algorithm that normalized ciliary length fluctuations of individual cilia to controls,  
152 reliably identified a disassembly start point, and assigned each disassembly behavior to one of the

153 three categories above, defined in the algorithm as follows: *gradual* if ciliary length just before  
154 complete disassembly ( $L_{\text{final-1}}$ ) was reduced compared to the length at the start of disassembly  
155 ( $L_{\text{start}}$ ); *instant* if  $L_{\text{final-1}}$  was greater than 1.5  $\mu\text{m}$ , below which length measurements were  
156 unreliable due to possible measurement error (Fig. S3A); *combined* if criteria for both *gradual*  
157 and *instant* were met in the same ciliary disassembly event (Fig. S3B, Materials & Methods).

158 To assess overall ciliary behaviors of each category, disassembly curves were normalized  
159 by time (normalized to 1000 arbitrary units) and ciliary length (normalized to the maximum length  
160 of each cilium), and averaged (Fig. 2C-E). The averaged curve of the *gradual* category shows  
161 early, initial ciliary shortening with event start points (circles) distributed along the curve, followed  
162 by a period of consistent length reduction in the last  $\sim 150$  normalized time units as the slope of the  
163 curve increased (Fig. 2C). The averaged curve of the *instant* category appears nearly horizontal  
164 until the last point, when the curve drops precipitously in a single time point; disassembly start  
165 points were nearly all clustered in the last  $\sim 10$  time units (Fig. 2D). The averaged curve of the  
166 *combined* category was intermediate between the *gradual* and *instant* plots, with a slight  
167 downward slope of gradual dynamics followed by a rapid loss of cilia length, with start points  
168 distributed along the curve (Fig. 2E).

169 The resulting disassembly rates from our Matlab analysis were in the range of  $10^{-3} - 10^1$   
170  $\mu\text{m}/\text{min}$  (Fig. 2F). The fastest rate was for *instant* disassembly and was in the range of  $10^1 \mu\text{m}/\text{min}$ .  
171 For the *combined* category, separate disassembly rates were calculated from the *gradual* and  
172 *instant* stages of cilia loss. Interestingly, the rate of the first *gradual* step of *combined* disassembly  
173 ( $0.083 \mu\text{m}/\text{min} \pm 0.259$ ) was not significantly different from that of the *gradual*-only rate ( $0.079$   
174  $\mu\text{m}/\text{min} \pm 0.106$ ), and the second (*instant*) step ( $3.414 \mu\text{m}/\text{min} \pm 2.098$ ) was comparable to the  
175 *instant*-only rate ( $3.882 \mu\text{m}/\text{min} \pm 1.802$ ) (Fig. 2F). However, the majority of ciliary length in the



176 *combined* category ( $72.6 \pm 4.5\%$ ) was lost during the *instant* stage. These results indicate that the  
177 *combined* disassembly behavior likely represents both *gradual* and *instant* mechanisms within the  
178 same cilium, rather than a separate mechanism accounting for the biphasic dynamics.

179 Finally, we asked whether there was a correlation between the initiation of ciliary  
180 disassembly after serum stimulation and disassembly behavior. Disassembly start and end times  
181 were plotted as a histogram (Fig. S4). *Gradual* disassembly events most frequently initiated in the  
182 first two hours of serum stimulation (Fig. S4A), although the sample size was low due to the  
183 relative rarity of this event ( $n=11$ ). *Instant* disassembly events increased progressively over the  
184 first three hours of stimulation, and appeared to be more widely distributed throughout the time  
185 course (Fig. S4B). Interestingly, *combined* category disassembly start times, marking the onset of  
186 the initial *gradual* stage, were most frequent in the first two hours after stimulation. *Combined* end  
187 points, which occurred with *instant* dynamics, progressively increased over the first three hours,  
188 in agreement with the *instant* category (Fig. S4C). These results further illustrate that *combined*  
189 disassembly behaviors share features of *gradual* and *instant* disassembly behaviors.

190 Taken together, our analysis identified three categories for primary cilia disassembly  
191 behavior in IMCD3 cells: *gradual*, *instant*, and *combined*. Importantly, the *instant* and *combined*  
192 categories jointly account for 83.1% ( $n=70$ ) of all ciliary disassembly events (Fig. 2G), and the  
193 *instant* step in the *combined* category accounted for approximately 75% of ciliary length loss.

194

### 195 ***Instant* cilia loss dynamics are consistent with extracellular shedding**

196 Our results show that in mammalian cells the final stages of cilia disassembly and loss are on the  
197 time scale of seconds, which is several orders of magnitude more rapid than expected for  
198 resorption mechanisms as reported in *Chlamydomonas*. However, much more rapid cilium

199 retraction into the cell has been reported in other unicellular eukaryotes, such as the chytrid fungi  
200 (52). To better determine the mechanism of cilium disassembly in mammalian cells we sought to  
201 identify sequences in which the loss event could be visualized.

202 In a rare instance, we observed direct shedding of ciliary membrane from the cell surface  
203 (Fig. 3A, Movie S5). In addition, ciliary shedding induced by treatment with dibucaine had similar  
204 qualitative features and dynamic profiles to serum-induced *instant* disassembly (Fig. S5)  
205 (40,41,53). The rapid nature of complete ciliary detachment in under 54 secs, and the diffusion of  
206 the shed remnant(s) away from the site of origin is consistent with our observations of the  
207 disappearance of the ciliary membrane with *instant* dynamics in 83.1% of disassembly events (Fig.  
208 2G).

209 The shed cilia in Fig. 3A have a fragmented appearance. We interpret this as being the  
210 result of the free ciliary fragment moving at a faster rate than the rate of z-stack acquisition, rather  
211 than sequential loss of small segments of the cilium. Because the shed cilium travels some distance  
212 in the time between individual z-slice acquisitions, the apparent location of an object in that slice  
213 will have shifted. As a result, the final imaged object appears distorted – artificially elongated or  
214 with the appearance of separated fragments. We note that the membrane segments in such  
215 sequences were usually visualized as a group that moved together, rather than dispersing  
216 independently, consistent with the interpretation that they are all part of the same structure imaged  
217 at different times.

218 We asked whether the cilium was released with or without the axoneme. Excision of  
219 portions of the ciliary membrane alone has been previously reported (42–44). To test this, IMCD3-  
220 SSTR3::GFP cells were transiently transfected with mCherry- $\alpha$ -tubulin, stimulated with serum,  
221 and imaged at 30 sec intervals. Tubulin was observed in shed ciliary fragments (Fig. 3B, Movie

222 S8), suggesting that the axoneme is shed together with the ciliary membrane and distinguishing  
223 this event from previously described ciliary membrane-fragment or ectosome release (42–44).

224

### 225 **Validation of ciliary shedding by isolation of ciliary fragments from culture media**

226 Observation of discrete shedding of the entire visible ciliary membrane supported the hypothesis  
227 that this behavior underlies *instant* ciliary disassembly dynamics (Fig 3A). Given the limitations  
228 of imaging described above, it was important to demonstrate the form in which the cilium is shed.  
229 We sought to detect ciliary fragments in the culture medium, predicted to be present based on the  
230 hypothesis of shedding as the mechanistic basis for *instant* disassembly.

231         Previously described methods of cilia isolation from mammalian cells have required  
232 artificial deciliation to synchronously release sufficient amounts of ciliary material for detection  
233 (41,54). To detect ciliary fragments released spontaneously from serum-stimulated cells we  
234 developed two novel methods (Fig. 3). First, immune-capture of cilia allowed direct visualization  
235 of the size and shape of unperturbed, shed ciliary fragments. In brief, culture medium from serum-  
236 stimulated cells was incubated on glass-bottomed imaging dishes coated with an antibody specific  
237 for the extracellular N-terminus of SSTR3 (Fig. S6A). Cilia expressing SSTR3-GFP bound the  
238 antibody (Fig. S6B), and were imaged, unfixed, by fluorescence (Fig. 3C) or after fixation, by  
239 electron microscopy (Fig 3E). A representative image of an antibody-captured, intact cilium is  
240 shown from IMCD3-SSTR3::GFP cells transfected with mCherry- $\alpha$ -tubulin to mark the axoneme  
241 (Fig. 3C). The jagged appearance of cilia in these samples is due to thermal motion in surrounding  
242 aqueous solution during stack acquisition. Quantification showed a 4-fold increase in cilia captured  
243 from medium from serum-stimulated cells compared to control medium from serum-starved cells.

244 As expected, pre-treating serum-stimulated cells with tubacin resulted in a decrease in the amount  
245 of captured cilia to levels in the control (Fig. 3D).

246 However, the cilia immune-capture method was limited by low amounts of material and  
247 instability of antibody-bound cilia, which made analysis by immunofluorescence or biochemistry  
248 difficult. Therefore, we developed a filter-spin cilia isolation method to concentrate large volumes  
249 of medium containing ciliary fragments (Fig. 3F&G, S6B). 40-80 mL of serum-starved or -  
250 stimulated culture media were subjected to a combination of filtration and centrifugation steps to  
251 concentrate ciliary material approximately 500-fold. As a positive control, serum-starved cells  
252 were scraped and treated with high-calcium deciliation buffer (55) to induce artificial shedding of  
253 cilia (see *Materials and Methods*). Immunostaining for ciliary markers (IFT88 and  $\alpha$ -tubulin)  
254 demonstrated increased abundance of ciliary structures in the concentrated material, many with  
255 the dimensions expected of shed primary cilia (Fig. 3F). Western blotting for IFT88,  $\alpha$ -tubulin,  
256 and acetylated tubulin further confirmed detectable levels of cilia-specific proteins in the  
257 concentrated medium (Fig. 3G).

258 Together, immune-capture and filter-spin concentration methods for ciliary isolation  
259 demonstrated the presence and correct dimensions of intact cilia containing ciliary membrane  
260 (SSTR3), axonemal tubulin, and other specific ciliary markers that were shed from serum-  
261 stimulated cells. The consistent detection of full-length, tubulin-containing cilia by two  
262 independent methods indicates that ciliary shedding is a physiological behavior of IMCD3 cells,  
263 and is a likely explanation for the most prevalent, *instant* ciliary disassembly behavior.

264

265 **p60 katanin activity regulates ciliary disassembly behaviors**

266 We next examined the roles of potential regulators of ciliary shedding in the disassembly  
267 behaviors that we had observed. In *Chlamydomonas*, the deflagellation-incompetent mutant Fa1p  
268 carries a mutation in a gene homologous to katanin, a conserved microtubule-severing AAA  
269 ATPase with roles in mitotic spindle formation and function, and axon extension in mammalian  
270 cells (56–58). In *Chlamydomonas*, katanin directly triggers axoneme severing *in vitro* and  
271 localizes to the site of axoneme breakage at the transition zone (39,59,60). Katanin  
272 overexpression also induced ciliary disassembly in *Tetrahymena* (61).

273 In order to determine whether katanin activity contributed to ciliary disassembly by  
274 shedding in mammalian cells, we overexpressed the catalytic domain of mouse katanin, p60  
275 (KATNA1) in IMCD3-SSTR3::GFP cells. We imaged tRFP fluorescence for the transfected p60,  
276 and used a p60-specific antibody for total katanin (including endogenous protein) in IMCD3-  
277 SSTR3::GFP-turboRFP(tRFP) control and IMCD3-SSTR3::GFP-tRFP::p60 cells. Both  
278 endogenous p60 and tRFP-p60, but not tRFP alone, were located at mitotic spindles and  
279 diffusely in the cytoplasm. In some cells, a punctum of katanin fluorescence was clearly detected  
280 at the basal body of cilia (Fig. 4A). The level of cytoplasmic acetylated tubulin was reduced  
281 significantly in serum-starved and -stimulated (2 hr) tRFP-p60 expressing cells compared to the  
282 control (Fig. S6A-B), indicating that over-expressed katanin was active and induced increased  
283 severing and destabilization of cytoplasmic microtubules (61,62).

284 We assessed the effect of p60 overexpression on ciliary abundance, length, and  
285 disassembly behavior on a population level. Fixed, serum-starved tRFP- and tRFP-p60-  
286 expressing cells displayed similar levels of ciliation and responded similarly to 6-hour serum  
287 stimulation (Fig. S6C). However, ciliary length was significantly reduced in tRFP-p60 cells, as  
288 measured from confocal z-stacks of live cells (Fig. 4B). Tubacin and cytochalasin D treatments

289 inhibited ciliary disassembly in both tRFP and tRFP-p60 cells (Fig. S6D). These results indicate  
290 that p60 activity did not impair overall ciliogenesis or spontaneously induce ciliary disassembly,  
291 but reduced ciliary length.

292         Next, we asked whether tRFP-p60 overexpression affected ciliary disassembly dynamics.  
293 Ciliary disassembly events were observed and analyzed as described above (see Fig. 2). In tRFP  
294 expressing cells, *combined* disassembly was the largest category of disassembly events (53.3%,  
295 n=61). In tRFP-p60 cells, *gradual* disassembly was virtually eliminated, while the frequency of  
296 *instant* disassembly increased ~33% (n=50). Cumulative average disassembly curves normalized  
297 to disassembly time and cilium length further illustrated a difference in ciliary disassembly  
298 dynamics (Fig. 4D-G). Due to the low frequency of *gradual* disassembly events, only *combined*  
299 and *instant* behaviors are discussed further. In both *combined* and *instant* disassembly categories,  
300 the cumulative curves from tRFP expressing control cells (Fig. 4D&F) have a steeper slope than  
301 the equivalent plots from p60 overexpressing cells (Fig. 4E&G). These data demonstrate that in  
302 tRFP-p60 cells ciliary disassembly by *gradual* dynamics (either *gradual*-alone or *combined*  
303 events) was generally reduced, and *instant* disassembly was more prevalent.

304

### 305 ***Intracellular calcium does not act synergistically with p60 to promote ciliary shedding***

306 High extracellular calcium and drug-induced increases in intracellular calcium levels have been  
307 used to artificially force ciliary shedding in ciliates, flagellates, and mammalian cells  
308 (40,41,55,63). However, mechanisms underlying this effect have not been elucidated. Calcium-  
309 calmodulin signaling is upstream of AurA, a key activator of ciliary disassembly (20), indicating  
310 a role for changes in cytoplasmic calcium levels in ciliary disassembly. We tested whether or not

311 increased intracellular calcium levels and katanin worked synergistically to promote ciliary  
312 shedding.

313 To examine the roles of intracellular calcium levels and p60 overexpression in cilia  
314 disassembly, we used well-known small molecule modulators of intracellular calcium levels  
315 (dibucaine (40,41,64,65), ionomycin (66), and thapsigargin (41,67) increase cytoplasmic calcium  
316 levels; BAPTA-AM, a calcium chelating agent, reduces calcium levels (68)) on tRFP- and tRFP-  
317 p60-overexpressing IMCD3 cells, and ciliation rates and length were quantified (Fig. 5).

318 tRFP and tRFP-p60 expressing cells were serum-starved, pre-treated with dibucaine,  
319 ionomycin or thapsigargin, fixed, and the percentage of cells that were ciliated was measured.  
320 Cilia counts for each treatment were normalized to levels in DMSO-treated cells to give a  
321 relative change in ciliation. Both dibucaine and ionomycin caused a significant reduction in the  
322 abundance and length of cilia in both tRFP- and tRFP-p60-expressing cells (Fig. 5AB). These  
323 results indicate that increased cytoplasmic calcium levels, either through release of intracellular  
324 membrane-bound calcium (dibucaine, (64,65)) or influx of extracellular calcium (ionomycin,  
325 (66)), had similar effects in negatively regulating primary cilia, and that tRFP-p60  
326 overexpression did not affect this response. In contrast, 5  $\mu$ M thapsigargin, which releases  
327 intracellular calcium stores (67,69), reduced ciliary abundance but not length in tRFP expressing  
328 cells, and increased the abundance and length of cilia in tRFP-p60 expressing cells (Fig. 5CD).

329 To reduce the level of cytoplasmic calcium, serum-starved cells were pre-treated with  
330 BAPTA-AM for 30 min. Consistent with previously published results (20), the percent of  
331 ciliated cells after 2 hr and 6 hr serum stimulation was reduced in BAPTA- but not DMSO-  
332 treated tRFP expressing cells, demonstrating that ciliary disassembly was inhibited by  
333 intracellular calcium chelation. In contrast, tRFP-p60 expressing cells had levels of ciliary

334 disassembly that were similar in DMSO and BAPTA-AM treated conditions (Fig. 5E). In  
335 addition, BAPTA-AM treatment caused a significant reduction in overall ciliary length in tRFP-  
336 p60, but not in tRFP expressing cells (Fig. 5F). Taken together, these results indicate that  
337 intracellular calcium and katanin do not synergistically promote ciliary loss. The negative  
338 relationship between intracellular calcium levels and cilia disassembly may be dependent on the  
339 source or concentration of intracellular calcium, and p60 overexpression alters this relationship.

340

## 341 **Discussion**

342 We examined cilium disassembly in mammalian cells, using live-cell single-cilium analysis,  
343 revealing highly heterogeneous rates of cilium loss, spanning approximately three orders of  
344 magnitude, from hours to seconds. These behaviors fell into three categories – *gradual*  
345 disassembly ( $10^{-3} - 10^{-1}$   $\mu\text{m}/\text{min}$ ), *instant* disassembly ( $10^1$   $\mu\text{m}/\text{min}$ ), and *combined* disassembly,  
346 consisting of consecutive *gradual* and *instant* dynamic phases. We conclude from these  
347 observations that there may be different mechanisms by which a cilium is disassembled within a  
348 single cell type, and even within a single cilium (in the case of *combined* disassembly). We  
349 propose that *gradual* disassembly is explained by disassembly of the axoneme and ciliary  
350 resorption, and *instant* disassembly is best explained by ciliary shedding. Interestingly, the  
351 shedding and resorption behaviors described in *Chlamydomonas*, chytrid fungi, and other  
352 organisms, are conserved in very distantly-related mammalian cells.

353         The co-existence of resorption and shedding in *combined* disassembly is intriguing, as it  
354 indicates differential regulation of the distal and proximal portions of the cilium leading to  
355 different methods of disassembly in each. A similar phenomenon has been described in  
356 *Chlamydomonas*, in which the initial resorption of the bulk of the flagellum was followed by  
357 severing the remainder from the basal body and release of a small particle into the surrounding



358 medium (36). The wide range of disassembly rates in the *gradual* category that we observed in  
359 IMCD3 cells indicates that there are several resorption mechanisms, or one mechanism with  
360 highly tunable dynamics. Thus, a *combined* resorption-severing behavior may be conserved  
361 between *Chlamydomonas* and mammalian cells.

362         What could contribute to differential regulation of distal and proximal portions of the  
363 cilium? One study showed that that different kinases and downstream effectors control the  
364 disassembly of the distal and proximal regions of the flagellum, but both contribute to resorption  
365 (29). It is also becoming apparent that structural features of the axoneme may contribute to the  
366 regulation of different regions of the cilium, such as the transition from doublet to singlet  
367 microtubules or the distribution of microtubule post-translational modifications that are non-  
368 uniformly distributed in the axoneme (70–72). Additionally, there may be a length- or time-  
369 dependent switch or signal that activates a new mechanism once the cilium has been partially  
370 disassembled. The conditions and factors underlying the decision to undergo one type of  
371 disassembly over another are likely complex and will require further study.

372         Taking *instant* and *combined* disassembly categories together (because the last stage of  
373 *combined* disassembly is an *instant* loss event), *instant* dynamics accounted for the majority of  
374 the ciliary disassembly events observed in IMCD3 mammalian cells. Direct observation of  
375 tubulin and the membrane marker SSTR3 during ciliary loss from the cell surface indicated  
376 extracellular shedding of cilia. This was further supported with two independent methods that  
377 isolated ciliary fragments shed into the medium. The presence of ciliary material in serum  
378 starvation media was unexpected, but repeatable, and due to two major causes – 1) ciliary  
379 shedding is a means for ciliary disassembly, but does not exclusively occur in disassembling  
380 cilia, as we have observed shedding and immediate ciliary regrowth in serum starved cells (data

381 not shown), and 2) cilia yields from the filter-spin concentration method are not reliably  
382 quantitative due to the potential for sample loss at several steps.

383         Regardless of these caveats, the morphology and composition of captured cilia confirmed  
384 3 major points regarding mechanisms of ciliary shedding: 1) cilia are shed as intact structures; 2)  
385 the fragmented appearance of shed cilia in live cell imaging are likely the result of confocal  
386 imaging of a highly dynamic process, rather than cilium fragmentation; and 3) shed cilia contain  
387 tubulin, implying that the axoneme is severed and shed along with the ciliary membrane. These  
388 results are also consistent with the observation of discontinuous axonemes, and the frequent  
389 observation of *instant* disassembly in which the entire ciliary membrane is shed cleanly from the  
390 basal body in response to serum stimulation or dibucaine. Together, these observations strongly  
391 support the hypothesis that highly prevalent *instant* disassembly is due to ciliary shedding, and  
392 distinguishes our results from previous studies that described the release of ectosomes, apical  
393 abscission, and decapitation of the ciliary membrane alone (42–44).

394         A limitation of our live cell imaging of ciliary disassembly was the high fluorescence  
395 background in the cytoplasm, which meant that we could not follow the fate of the axoneme and  
396 membrane during ciliary resorption. Nevertheless, in fixed cells we identified several novel non-  
397 canonical ciliary structures in serum-stimulated cells that might be ciliary disassembly  
398 intermediates, which might provide insight into mechanisms for ciliary shedding and resorption,  
399 for example: 1) discontinuous acetylated tubulin staining indicates a break in the axoneme, and  
400 the accompanying constriction at that site in SSTR3 membrane fluorescence indicates membrane  
401 pinching that could portend ciliary severing at that site prior to shedding; 2) a ciliary stub  
402 positive for acetylated tubulin and SSTR3-GFP could represent a remnant of a shed or resorbed  
403 cilium close to the cell surface (73), although at this resolution it cannot be determined whether

404 the ciliary stub is on the cell surface or in the cytoplasm; and, 3) acetylated tubulin fluorescence  
405 without corresponding SSTR3 membrane fluorescence indicates a resorbed axoneme-basal body  
406 complex in the cytoplasm, as has been observed previously (74), in which the membrane was  
407 released or incorporated into the plasma membrane. While these interpretations are speculative,  
408 due to the nature of static representations of a dynamic process and the markers of ciliary  
409 structures, the relative lack of these ciliary structures in starved and tubacin-treated conditions  
410 indicates that they may be representative of the ciliary disassembly process.

411 We assessed the roles of the microtubule severing enzyme katanin and intracellular  
412 calcium in regulating ciliary shedding. Katanin mediates axoneme severing and ciliary shedding  
413 in *Chlamydomonas* and *Tetrahymena* (39,60,61,75), and high intracellular calcium levels trigger  
414 ciliary shedding in *Chlamydomonas* and mammalian cells (39–41). Overexpression of the  
415 katanin catalytic domain p60 reduced ciliary length, and nearly eliminated the *gradual* category  
416 of ciliary disassembly, which was compensated for by an increase in the *instant* disassembly  
417 category. Therefore, upregulation of katanin activity would likely promote *instant* ciliary  
418 disassembly behavior, and, by extension, ciliary shedding. Interestingly, we did not find that p60  
419 overexpression affected general ciliation, in contrast to previous work showing a ciliogenesis  
420 defect in response to overexpression of the related proteins katanin-like 2 (KATNAL2) (76) and  
421 fidgetin-like 1 (FIGL1) (77). This may be due to differences in protein functions or levels of  
422 protein expression, or criteria for categorizing short versus absent cilia. Alternatively, p60-  
423 overexpression in serum-starved cells may cause ciliary severing at sites other than the ciliary  
424 base (Fig. 1C, 3B), or shedding from the base might be rapidly followed by cilium regrowth in  
425 quiescent cells (M. Mirvis, unpublished results), either of which could result in an apparent  
426 decrease in the average cilium length in a cell population.

427           Based on previous work in *Chlamydomonas* showing that both katanin and raised  
428 intracellular calcium levels spontaneously induce ciliary breakage and severing *in vivo* and *in*  
429 *vitro* (39), we tested whether they act synergistically in promoting ciliary shedding and overall  
430 disassembly in IMCD3 cells. Consistent with previously published results, we found that  
431 addition of drugs that raise intracellular calcium levels reduced ciliary number and length, while  
432 chelating intracellular calcium inhibited ciliary disassembly in control cells (20,41).  
433 Unexpectedly, overexpression of p60 had opposing effects – addition of thapsigargin increased  
434 the number and length of cilia, while BAPTA-AM shortened cilia and failed to inhibit serum-  
435 induced ciliary loss. Thus, intracellular calcium levels and katanin do not act synergistically or  
436 additively to promote ciliary shedding. Little is known regarding a direct relationship between  
437 calcium and katanin, although one study showed that p60 has several calcium binding sites, and  
438 that calcium binding inhibited p60 severing activity (78). Interestingly, high calcium levels have  
439 been shown to affect induce primary cilium bending by altering axoneme microtubule  
440 morphology (79).

441           Our work raises many new questions regarding the mechanisms and dynamics of primary  
442 ciliary disassembly that will need to be addressed in future studies. Why do multiple mechanisms  
443 for ciliary disassembly exist? Could ciliary resorption and shedding have specific advantages for  
444 cell cycle regulation or signaling? How is the ciliary membrane separated from the cell during  
445 ciliary shedding? Recently published work identified an actin-dependent phosphoinositide-based  
446 pathway underlying ciliary decapitation (43), and ciliary disassembly activator Aurora A may act  
447 upstream of this pathway (45). Future work may focus on whether the same mechanism is  
448 responsible for membrane detachment at the ciliary base. What is the precise mechanism of  
449 axoneme severing by katanin? Future studies using immunogold electron microscopy could

450 determine whether katanin is localized specifically to the transition zone in mammalian cells, as  
451 shown in *Chlamydomonas* (59). Furthermore, answering how katanin carries out complete,  
452 localized, coordinated disruption of the axoneme despite the complex microtubule structure of  
453 the axoneme may provide novel insights into general mechanisms for microtubule severing.

454

#### 455 **Acknowledgements**

456 We thank Jonathan Indig for critical assistance with developing and writing the Matlab  
457 algorithm, Fan Ye and the Max Nachury lab for the gift of IMCD3-SSTR3::GFP cells, Martijn  
458 Gloerich for assistance with lentivirus, Daniel Cohen and Caitlin Collins for technical assistance  
459 with cilia immune-capture, Lydia Joubert and the Beckman Cell Sciences Imaging Facility for  
460 assistance with SEM sample preparation and imaging. We thank Jessica Feldman, Lucy O'Brien,  
461 Jackson Liang, and members of the Nelson and Stearns laboratories for invaluable discussion of  
462 the methods and results. Research reported in this publication was supported by the National  
463 Institute of General Medical Sciences of the National Institutes of Health under award number  
464 T32GM007276 (M.M.), R35 GM118064 to W.J.N. and R01GM121424 to T.S. The content is  
465 solely the responsibility of the authors and does not necessarily represent the official view of the  
466 National Institutes of Health.

467

468

469

470

471

472

473 **Materials & Methods**

474

475 **Cell Culture.** IMCD3 cells were grown in DMEM-F12 medium with 10% fetal bovine serum  
476 and 1% penicillin-streptomycin-kanamycin antibiotic cocktail. Cells were passaged every 2-3  
477 days at 1:10-1:20 dilution. Cells were tested for mycoplasma with Sigma LookOut Mycoplasma  
478 PCR Detection Kit (Cat#MP0035) as directed by the manufacturer, and incidences of  
479 mycoplasma contamination was treated with Mycoplasma Removal Agent (MP Biomedicals,  
480 #093050044). Following decontamination, experiments potentially affected were repeated at  
481 least three times to determine any difference in results. No significant differences were observed.

482 **Serum Starvation and Stimulation.** Cells were seeded in 24- or 6-well dishes with glass  
483 coverslips for imaging following fixation, or 35 mm glass-bottomed MatTek dishes (#P35G-0-  
484 10-C) for live imaging. 24-well dishes were seeded at  $1.5 \times 10^4$  cells and 6-well and 35 mm  
485 MatTek dishes were seeded at  $1-1.5 \times 10^5$ , to achieve 50-70% confluence next day. For serum-  
486 starvation, cells were washed once with 0.2% DMEM-F12 + PSK, then grown in 0.2% DMEM-  
487 F12 + PSK for 24 hr. Serum stimulation was by either re-addition of FBS directly to dishes to  
488 10% final concentration, or replacement with 10% FBS DMEM-F12.

489 **Antibodies.** The following antibodies and dilutions were used. Acetylated tubulin mouse  
490 monoclonal 6-11B-1 (1:1000 for IF & WB) (Sigma-Aldrich Cat# T7451); Pericentrin rabbit  
491 polyclonal Poly19237 (1:500 for IF) (Covance Cat #PRB-432C, now BioLegend); Arl13b rabbit  
492 polyclonal (1:250-1:500 for IF) (Proteintech Cat# 17711-1-AP); N19-SSTR3 antibody (rabbit  
493 polyclonal) (Santa Cruz Cat #sc-11610, discontinued); IFT88 rabbit (1:500 for IF & WB)  
494 (GeneTex, Cat#79169);  $\alpha$ -tubulin YL1/2 (1:1000 for IF & WB), (ThermoFisher #MA1-080017);  
495 alpha-tubulin DM1a (1:1000 for IF & WB) (ThermoFisher #62204); rabbit monoclonal anti-p60

496 EPR5071, (1:250 IF), (Abcam Cat# ab111881); rabbit polyclonal anti-KATNA1, (1:100-250 IF)  
497 (Proteintech Cat#17560-1-AP). Anti-rabbit GFP (1:250) (Life Technologies, #A11122); Anti-  
498 mouse GFP (1:1000) (Roche, #11063100). Secondary antibodies used were: Anti-mouse  
499 Rhodamine (1:1000) (Jackson ImmunoResearch, #715-295-150), Anti-rabbit FITC (1:1000)  
500 (Jackson ImmunoResearch, #111-095-003), Anti-rabbit Alexa647 (1:200) (Life Technologies,  
501 #A21245), Anti-mouse Alexa647 (1:200) (Life Technologies, #A21236), Hoescht (1:1000-2000)  
502 (Molecular Probes, #H-3570).

503 **Chemicals.** Tubacin (Sigma-Aldrich, #SML0065) at 2  $\mu$ M in DMSO; dibucaine hydrochloride,  
504 (Sigma-Aldrich #285552) at 190  $\mu$ M in DMSO. The following were used at 1  $\mu$ M in DMSO:  
505 Cytochalasin D (#PHZ1063), Thapsigargin, (Sigma-Aldrich #T9033). BAPTA-AM (Sigma-  
506 Aldrich #A1076). Ionomycin 10 mM stock was a gift from the Lewis laboratory, Stanford Univ.

507 **Generation of stable cell lines.** IMCD3-SSTR3::GFP-mCherry::PACT: mCherry::PACT was  
508 cloned from a pLV plasmid (pTS3488, created by multi-site Gateway cloning by Christian  
509 Hoerner) onto pLV-Puro-EF1a construct using Gibson cloning. Lentivirus with the cloned  
510 construct was generated in HEK293T and used to infect IMCD3-SSTR3::GFP (gift from  
511 Nachury laboratory, (46)) under selection with 800 mg/mL puromycin for 4-5 days. Infected  
512 cells were FACS-sorted into polyclonal populations by mCherry fluorescence intensity, and a  
513 pool of low-expressing cells were selected to prevent over-expression phenotypes of a  
514 centrosomal protein.

515 Katanin expression constructs: Mammalian expression constructs for turboRFP and  
516 turboRFP::p60 (p60 domain of mouse katanin) were designed and ordered from VectorBuilder.

517 All constructs were amplified by transformation in DH5 $\alpha$  and maxi-prep (Qiagen #12165).

518 IMCD3-SSTR3::GFP cells were transfected with each construct with ThermoFisher  
519 Lipofectamine 3000 according to manufacturer's protocol (#L3000015). The next day, cells were  
520 subjected to G418 selection (800ng/ $\mu$ L for 5-6 days). Cells were sorted by FACS into low-,  
521 medium-, and high-expressing pools, and maintained in DMEM-F12 10% FBS + PSK and 250  
522 ng/ $\mu$ L G418 to maintain transgene expression.

523 **Transient transfection.** mCherry- $\alpha$ -tubulin mammalian expression construct was a gift from  
524 Angela Barth, Stanford Univ., and transfected into IMCD3-SSTR3::GFP cells. Transfections  
525 were performed using Lipofectamine 3000 transfection reagent according to manufacturer's  
526 protocol.

527 **Immunofluorescence microscopy.** Generally, fixation for immunofluorescence microscopy was  
528 done with 100% methanol for 5 minutes at -20°C, followed by washes with 0.1% Triton X-100  
529 in PBS at room temperature for 2 minutes, and 3 PBS washes. Samples were blocked for 1 hr at  
530 RT°C or overnight at 4°C in 2% BSA, 1% goat serum, 75mM NaN<sub>3</sub>. Antibodies were diluted to  
531 indicated concentrations in blocking buffer. Primary antibody incubations were performed for 1  
532 hr at RT°C or overnight at 4°C. Secondary antibody incubations were performed for 1-2 hr at  
533 RT°C. Following each antibody incubation, samples were washed 3 times in PBS + 0.05%  
534 Tween-20 for 5 mins each at RT°C.

535 Images were acquired with a Zeiss Axiovert 200 inverted epifluorescence microscope and a 63x  
536 objective, or a Leica SP8 scanning laser confocal microscope with LASX Software, using  
537 mercury or argon lamps with white light laser excitation, and a 63x 1.4 NA oil objective.  
538 Exposure times were constant during each experiment. For imaging of serum-starved and serum-  
539 stimulated cells, fields of view were selected based on DAPI staining by two criteria: 1) to select



540 for moderate cell density, in order to avoid effects of high density on cell cycle and ciliation; and  
541 2) to eliminate bias in % cilia quantifications from scanning by ciliary markers.

542 **Live-cell confocal microscopy.** Cells were cultured in glass-bottomed Mattek dishes and imaged  
543 in DMEM-F12 media with 15mM HEPES without phenol red. Movies were acquired 4-12 hr  
544 after serum stimulation with a Leica SP8 scanning laser confocal microscope using 0.5  $\mu\text{m}$  z-  
545 slices, 30-90 sec intervals, autofocus, in a 37°C incubator, and red and green channels were  
546 acquired simultaneously. The video file was saved as .lif from LASX software and opened in  
547 Imaris x64 8.0.2 as a 3D render for analysis of cilia disassembly dynamics and basal body  
548 positioning.

549 **Data analysis.** Cilia counts and length measurements were performed either manually in Fiji or  
550 Imaris x64 8.0.2 and 9.2.1, or through semi-automated detection in Imaris. Manual analysis  
551 involved detecting ciliary membrane, marked by an enrichment of SSTR3::GFP above  
552 background threshold, that were adjacent to a centriole (mCherry::PACT in dual-fluorescent  
553 cells or pericentrin immunofluorescence in single- (SSTR3::GFP-expressing) or non-fluorescent  
554 cells), to distinguish from accumulations of SSTR3+ membrane elsewhere in the cell. Manual  
555 length measurements in Fiji were made with the line function, and in Imaris with the  
556 Measurement tool. Generally, single z-plane images were analyzed in Fiji or Imaris, while  
557 confocal z-stacks were analyzed in Imaris which allowed more accurate length measurement due  
558 to the 3D render (Surpass) capability. When possible, length measurements in confocal images  
559 were semi-automated in Imaris using the Surfaces function to create an artificial object  
560 encompassing the ciliary membrane, and exporting Bounding Box data as a proxy for length (the  
561 longest dimension of the object).

562 For live cell serum stimulation experiments, movies were visually scanned in Imaris for  
563 examples of disassembling cilia. Images of each disassembling cilium were cropped by time  
564 (from  $t_0$  to several mins after complete loss), and position (restricted to area of occupancy during  
565 the that time window), and then saved in a separate file. To generate ciliary length curves, the  
566 ciliary membrane was isolated as an artificial object using the Surface function. When possible,  
567 the object was automatically tracked over consecutive time points with length data generated at  
568 each time point. In cases where automatic tracking was not possible due to low signal-to-noise of  
569 ciliary membrane fluorescence, measurements were taken manually at 15-30 minute intervals  
570 until the initiation of ciliary disassembly, and at each time point during the disassembly event.

571 *Matlab*: Raw length measurement data from disassembling cilia movies were compiled in to an  
572 Excel spreadsheet. A Matlab algorithm imported the data, performed smoothing and calculations  
573 of cilium start point, and generated an output file containing disassembly rates, start and end  
574 time, start and end length, and proportion length lost per disassembly stage. Algorithm strategy is  
575 described in the text and Supplement.

576 **Cilia Isolation.** Cell culture: clones of IMCD3 cells, either an unsorted stably expressing GFP-  
577 SSTR3 or FACS sorted for medium expression of GFP-SSTR3, were grown on 15cm dishes at  
578  $3 \times 10^6$  cells/dish in DMEM/F12 with 10% FBS and antibiotics for 24 hours. The cells were  
579 washed 3x with HDF wash buffer, and media was replaced with DMEM/F12 and 0.2% FBS and  
580 antibiotics (serum-starved) for 24 hours. Then all dishes were washed 3x with HDF buffer and  
581 half received phenol-red free DMEM/F12 with 0.2% FBS (serum-starved), and the other half  
582 received phenol red free DMEM/F12 with 10% FBS (serum-stimulated) for 24 hours. Total  
583 serum starved time was 48 hours and total serum stimulated time was 24 hours.

584 *Immune-capture Method.* Preparation of antibody-immobilized imaging dishes: Glass in 35 mm  
585 glass-bottomed imaging dishes (MatTek) was functionalized by plasma cleaning at 250 mtor,  
586 Low setting, 45-60 seconds. Dishes were silanized with 500  $\mu$ L of 2.5% triethoxysilyl-undecanal  
587 (TESU) in 100% ethanol, covered with Parafilm and incubated at RT°C for 1hr. Dishes were  
588 washed 3x with 100% ethanol, then baked at 85°C for 3 hrs. Next, silanized dishes were treated  
589 with the following series of reagents for 1hr at RT°C unless stated otherwise, with 3 PBS washes  
590 in between steps: 1) 50mM NHS-LC- LC-biotin in water, 2) 5mg/ml neutravidin for 1hr at  
591 RT°C, 3) 300  $\mu$ g/ml biotin-Protein A 4) block with 15mM D-biotin in DMSO for 30 min, 5) anti-  
592 rabbit SSTR3 N19 (extracellular N-terminus) antibody (100-200  $\mu$ g/mL) at 37°C, followed by  
593 one PBS wash. These protocols adapted from Dr. Nicholas Borghi (80).

594 Sample preparation: Culture medium was collected and subjected to centrifugation for 10 min at  
595 1000xg at 4°C to remove large cell debris. Samples were then kept on ice until plating on treated  
596 dishes or stored at 4°C for a maximum of 1 day. 4mL serum-stimulated or -starved medium was  
597 incubated on a treated MatTek dish overnight at 4°C, followed by 3 gentle PBS washes. Samples  
598 were then imaged directly, without fixation with a Leica SP8 confocal microscope.

599 SEM: Antibody-immobilized MatTek dishes incubated with serum stimulation medium were  
600 fixed for SEM in 4% PFA, 2% glutaraldehyde, and 0.1M Na cacodylate. Glass bottoms were  
601 removed, processed for imaging, and imaged with a Hitachi S-3400N VP SEM scope in the  
602 Beckman Imaging Facility, Stanford Univ.

603 *Filter-Spin Concentration Method.* Harvest of Cilia: Deciliation of starved IMCD3 cells  
604 (positive control): Serum-stimulated or -starved culture medium, or fresh culture medium (with  
605 10% FBS, an additional control) was removed from 6 150cm dishes, combined and centrifuged

606 at 200xg at 4°C for 5 mins in the A-4-81 rotor, Eppendorf 5810R centrifuge. Cells were washed  
607 2x with warm PBS containing 0.4% EDTA. 10 mL was added to a MatTek dish and incubated  
608 for 10 min at 37 °C, followed by gentle up and down pipetting to remove cells from dish. An  
609 aliquot of cell suspension was removed for cell count. Cells were centrifuged at 13000 x g for 5  
610 mins at RT°C. The cell pellet was resuspended in 5 mL ice cold deciliation buffer (55) (112 mM  
611 NaCl, 3.4 mM KCl, 10 mM CaCl<sub>2</sub>, 2.4 mM NaHCO<sub>3</sub>, 2 mM HEPES, pH7.0 and a protease  
612 inhibitor tablet [Roche]). The cell suspension was incubated at 4 °C for 15 mins with rigorous  
613 end-over-end rotation, and then centrifuged at 1000 x g for 5 mins at 4 °C in an Eppendorf  
614 centrifuge. The resulting supernatant was used for biochemistry and immunostaining.

615 Biochemistry: Half of the supernatant material from deciliated, serum starved or -stimulated cells  
616 was centrifuged at 21,000xg for 15 min in JA25.5 rotor in Beckman Coulter Avanti J-25I  
617 centrifuge at 4°C. The supernatant was carefully removed, and pellets were resuspended in 160  
618 µl of sample buffer (1% SDS, 10mM Tris-HCl, pH 7.5, 2mM EDTA). Samples were boiled at  
619 95°C for 8 mins, and equal volumes were separated by 10% PAGE and transferred to PVDF.  
620 Blots were blocked (2% BSA, 1% normal donkey and goat serum in TBS, pH 7.4) for 1hr at  
621 RT°C or overnight at 4°C. Membranes were blotted with YL1/2 (1:1000), mouse acetylated-  
622 tubulin antibody (1:1000), and IFT88 rabbit antibody (1:500) in blocking buffer for 1 hr at  
623 RT°C. Blots were washed 5x with TBST. Secondary anti-rabbit, anti-mouse, or anti-rat  
624 antibodies labeled with either Alexa Fluor 680 (Invitrogen, #A21058) or IRDye800CW (Li-Cor  
625 Biosciences, #926-32213), at 1:30,000 dilution were incubated with blots for 30 min at RT. Blots  
626 were washed 5x with TBST and scanned on Licor Odyssey scanner (Li-Cor BioSciences).

627 Immunofluorescence: Half of the supernatant material from deciliated, serum-starved, or -starved  
628 and -stimulated cells was concentrated using a 250ml 0.2µm PES filter unit with house vacuum

629 to reduce the volume to 2 mL, and finally a Millipore Ultrafree-MC filters (PVDF 0.2 $\mu$ m size  
630 #UFC30GV100) to reduce the volume to ~0.5 mL. 5  $\mu$ l of concentrated supernatant was pipetted  
631 onto an acid-treated glass slide. A 22 mm acid-treated circular glass coverslip was placed on the  
632 sample, and the slide was immediately plunged into liquid nitrogen for ~5 sec. After removing  
633 the slide, the coverslip was removed and fixed in -20 °C 100% methanol for 5 mins.  
634 Immunofluorescence staining was performed as described above.

635 **Statistics.** All analyses were performed in GraphPad Prism. Statistical tests used for each  
636 analysis are indicated in the Figure legends. No explicit power analysis was used to determine  
637 sample size. All experiments were performed with at least three biological replicates, i.e.  
638 samples from independent cell culture passages. When used, technical replicates (i.e. repeats  
639 from the same cell culture passage) were averaged for each biological replicate. In brief,  
640 comparisons of mean values such as mean percent cilia across replicate experiments were  
641 compared using an unpaired t-test. Analyses of individual measurements such as cilia length  
642 were subjected to normality tests (Kolmogorov-Smirnoff, D'Agostino & Pearson, and Shapiro-  
643 Wilk). If data passed all normality tests, unpaired t-test was used, if not the Mann-Whitney U test  
644 was used. If data passed normality by some tests but not others, both types of analyses were  
645 performed. Results were similar between parametric and nonparametric tests.

646

647

648

649

## 650 **References**

- 651 1. Mirvis M, Stearns T, James Nelson W. Cilium structure, assembly, and disassembly  
652 regulated by the cytoskeleton. *Biochem J.* 2018;475(14):2329–53.
- 653 2. Fisch C, Dupuis-Williams P. Ultrastructure of cilia and flagella - back to the future! *Biol*  
654 *Cell.* 2011;103(6):249–70.
- 655 3. Avasthi P, Marshall WF. Stages of ciliogenesis and regulation of ciliary length.  
656 2009;49(18):1841–50.
- 657 4. Mourão A, Christensen ST, Lorentzen E. The intraflagellar transport machinery in ciliary  
658 signaling. *Curr Opin Struct Biol.* 2016;41:98–108.
- 659 5. Scholey JM, Anderson K V. Intraflagellar Transport and Cilium-Based Signaling. *Cell.*  
660 2006;125(3):439–42.
- 661 6. Praetorius HA. The primary cilium as sensor of fluid flow: new building blocks to the  
662 model. A Review in the Theme: Cell Signaling: Proteins, Pathways and Mechanisms. *Am*  
663 *J Physiol - Cell Physiol.* 2015;308(3):C198–208.
- 664 7. Tucker RW, Pardee AB, Fujiwara K. Centriole ciliation is related to quiescence and DNA  
665 synthesis in 3T3 cells. *Cell.* 1979;17(3):527–35.
- 666 8. Plotnikova O V, Pugacheva EN, Golemis EA. Primary cilia and the cell cycle. *Methods*  
667 *Cell Biol.* 2009;94(08):137–60.
- 668 9. Kim S, Tsiokas L. Cilia and cell cycle re-entry: More than a coincidence. *Cell Cycle.*  
669 2011;10(16):2683–90.
- 670 10. Sung C-H, Li A. Ciliary resorption modulates G1 length and cell cycle progression. *Cell*  
671 *Cycle.* 2011;10(17):2825–6.
- 672 11. Plotnikova O V., Golemis EA, Pugacheva EN. Cell cycle-dependent ciliogenesis and

- 673 cancer. *Cancer Res.* 2008;68(7):2058–61.
- 674 12. Hildebrandt F, Benzig T, Katsanis N. Ciliopathies. *N Engl J Med.* 2016;27(5):743–51.
- 675 13. Lee K, Battini L, Gusella GL. Cilium, centrosome, and cell cycle regulation in polycystic  
676 kidney disease. *Biochim Biophys Acta - Mol Cell Res.* 2012;1812(10):1263–71.
- 677 14. Seeley ES, Nachury M V. The perennial organelle: assembly and disassembly of the  
678 primary cilium. *J Cell Sci.* 2010;123(4):511–8.
- 679 15. Li A, Saito M, Chuang JZ, Tseng YY, Dedesma C, Tomizawa K, Kaitsuka T, Sung C-H..  
680 Ciliary transition zone activation of phosphorylated Tctex-1 controls ciliary resorption, S-  
681 phase entry and fate of neural progenitors. *Nat Cell Biol.* 2011;13(4):402–11.
- 682 16. Kim S, Lee K, Choi JH, Ringstad N, Dynlacht BD. Nek2 activation of Kif24 ensures  
683 cilium disassembly during the cell cycle. *Nat Commun.* 2015;6:1–13.
- 684 17. Goto H, Inoko A, Inagaki M. Cell cycle progression by the repression of primary cilia  
685 formation in proliferating cells. *Cell Mol Life Sci.* 2013;70(20):3893–905.
- 686 18. Urrego D, Sánchez A, Tomczak AP, Pardo LA. The electric fence to cell-cycle  
687 progression: Do local changes in membrane potential facilitate disassembly of the primary  
688 cilium?: Timely and localized expression of a potassium channel may set the conditions  
689 that allow retraction of the primary cilium. *BioEssays.* 2017;39(6):1–6.
- 690 19. Korobeynikov V, Deneka AY, Golemis EA. Mechanisms for nonmitotic activation of  
691 Aurora-A at cilia. *Biochem Soc Trans.* 2017;45(1):37–49.
- 692 20. Plotnikova O V., Nikonova AS, Loskutov Y V., Kozyulina PY, Pugacheva EN, Golemis  
693 EA. Calmodulin activation of Aurora-A kinase (AURKA) is required during ciliary  
694 disassembly and in mitosis. *Mol Biol Cell.* 2012;23(14):2658–70.
- 695 21. Pugacheva EN, Jablonski SA, Hartman TR, Henske EP, Golemis EA. HEF1-dependent

- 696 Aurora A activation induces disassembly of the primary cilium. *Cell*. 2007;129(7):1351–  
697 63.
- 698 22. Sánchez I, Dynlacht BD. Cilium assembly and disassembly. *Nat Cell Biol*.  
699 2016;18(7):711–7.
- 700 23. Wang L, Gu L, Meng D, Wu Q, Deng H, Pan J. Comparative proteomics reveals timely  
701 transport into cilia of regulators or effectors as a mechanism underlying ciliary  
702 disassembly. *J Proteome Res*. 2017;16(7):2410–8.
- 703 24. Wang W, Wu T, Kirschner MW. The master cell cycle regulator APC-Cdc20 regulates  
704 ciliary length and disassembly of the primary cilium. *Elife*. 2014;3:e03083.
- 705 25. Liang Y, Meng D, Zhu B, Pan J. Mechanism of ciliary disassembly. *Cell Mol Life Sci*.  
706 2016;73(9):1787–802.
- 707 26. Lee KH, Johmura Y, Yu LR, Park JE, Gao Y, Bang JK, Zhou M, Veenstra TD, Kim BY,  
708 Lee KS. Identification of a novel Wnt5a-CK1 $\epsilon$ -Dvl2-Plk1-mediated primary cilia  
709 disassembly pathway. *EMBO J*. 2012;31(14):3104–17.
- 710 27. Ran J, Yang Y, Li D, Liu M, Zhou J. Deacetylation of  $\alpha$ -tubulin and cortactin is required  
711 for HDAC6 to trigger ciliary disassembly. *Sci Rep*. 2015;5:1–13.
- 712 28. Pan J, Wang Q, Snell WJ. An aurora kinase is essential for flagellar disassembly in  
713 *Chlamydomonas*. *Dev Cell*. 2004;6(3):445–51.
- 714 29. Hu Z, Liang Y, He W, Pan J. Cilia disassembly with two distinct phases of regulation.  
715 *Cell Rep*. 2015;10(11):1803–10.
- 716 30. Jang C-Y, Coppinger JA, Seki A, Yates JR, Fang G. Plk1 and Aurora A regulate the  
717 depolymerase activity and the cellular localization of Kif2a. *J Cell Sci*. 2009;122(9):1334–  
718 41.



- 719 31. Xu J, Li H, Wang B, Xu Y, Yang J, Zhang X, Harten SK, Shukla D, Maxwell PH, Pei D,  
720 Esteban MA. VHL Inactivation Induces HEF1 and Aurora Kinase A. *J Am Soc Nephrol.*  
721 2010;21(12):2041–6.
- 722 32. Wang G, Chen Q, Zhang X, Zhang B, Zhuo X, Liu J, Jiang Q, Zhang C.. PCM1 recruits  
723 Plk1 to the pericentriolar matrix to promote primary cilia disassembly before mitotic  
724 entry. *J Cell Sci.* 2013;126(6):1355–65.
- 725 33. Cao M, Li G, Pan J. Regulation of cilia assembly, disassembly, and length by protein  
726 phosphorylation.. First edit. Vol. 94, *Methods in cell biology.* Elsevier; 2009. 333-346 p.
- 727 34. Piao T, Luo M, Wang L, Guo Y, Li D, Li P, Snell WJ, Pan J. A microtubule  
728 depolymerizing kinesin functions during both flagellar disassembly and flagellar assembly  
729 in *Chlamydomonas*. *Proc Natl Acad Sci U S A.* 2009;106(12):4713–8.
- 730 35. Marshall WF, Rosenbaum JL. Intraflagellar transport balances continuous turnover of  
731 outer doublet microtubules: Implications for flagellar length control. *J Cell Biol.*  
732 2001;155(3):405–14.
- 733 36. Parker JDK, Hilton LK, Diener DR, Rasi MQ, Mahjoub MR, Rosenbaum JL, Quarmby  
734 LM. Centrioles are freed from cilia by severing prior to mitosis. *Cytoskeleton.*  
735 2010;67(7):425–30.
- 736 37. Lefebvre PA, Nordstrom SA, Moulder JE, Rosenbaum JL. ELONGATION AND  
737 SHORTENING IN CHLAMYDOMONAS IV. Effects of Flagellar Detachment,  
738 Regeneration, and Resorption on the Induction of Flagellar Protein Synthesis. *Cell.*  
739 1978;(36).
- 740 38. Bloodgood R. Resorption of Organelles Containing Microtubules. *Cytobios.*  
741 1974;9(35):143–61.

- 742 39. Lohret TA, McNally FJ, Quarmby LM. A role for katanin-mediated axonemal severing  
743 during *Chlamydomonas* deflagellation. *Mol Biol Cell*. 1998;9(5):1195–207.
- 744 40. Quarmby LM. Cellular Deflagellation. *Int Rev Cytol*. 2004;233:47–91.
- 745 41. Overgaard C, Sanzone K, Spiczka K, Sheff D, Sandra A, Yeaman C. Deciliation is  
746 associated with dramatic remodeling of epithelial cell junctions and surface domains. *Mol*  
747 *Biol Cell*. 2009;20(January):102–13.
- 748 42. Nager AR, Goldstein JS, Herranz-Pérez V, Portran D, Ye F, Garcia-Verdugo JM, Nachury  
749 MV. An actin network dispatches ciliary GPCRs into extracellular vesicles to modulate  
750 signaling. *Cell*. 2017;168(1–2):252–263.e14.
- 751 43. Phua SC, Chiba S, Suzuki M, Su E, Roberson EC, Pusapati G V., Setou M, Rohatgi R,  
752 Reiter JF, Ikegami K, Inoue T. Dynamic remodeling of membrane composition drives cell  
753 cycle through primary cilia excision. *Cell*. 2017;168(1–2):264–279.e15.
- 754 44. Das RM, Storey KG. Apical abscission alters cell polarity and dismantles the primary  
755 cilium during neurogenesis. *Science*. 2014;343(6167):200–4.
- 756 45. Plotnikova O V., Seo S, Cottle DL, Conduit S, Hakim S, Dyson JM, Mitchell CA, Smyth  
757 IM. INPP5E interacts with AURKA, linking phosphoinositide signaling to primary cilium  
758 stability. *J Cell Sci*. 2015;128(2):364–72.
- 759 46. Ye F, Nager AR, Nachury M V. BBSome trains remove activated GPCRs from cilia by  
760 enabling passage through the transition zone. *J Cell Biol*. 2018;180620.
- 761 47. Haggarty SJ, Koeller KM, Wong JC, Grozinger CM, Schreiber SL. Domain-selective  
762 small-molecule inhibitor of histone deacetylase 6 (HDAC6)-mediated tubulin  
763 deacetylation. *Proc Natl Acad Sci*. 2003;100(8):4389–94.
- 764 48. Tran DA-A, Marmo TP, Salam AA, Che S, Finkelstein E, Kabarriti R, Xenias HS,

- 765 Mazitschek R, Hubbert C, Kawaguchi Y, Sheetz MP, Yao T-P, Bulinski JC. HDAC6  
766 deacetylation of tubulin modulates dynamics of cellular adhesions. *J Cell Sci.* 2007;120(Pt  
767 8):1469–79.
- 768 49. Quarmby LM, Parker JDK. Cilia and the cell cycle? *J Cell Biol.* 2005;169(5):707–10.
- 769 50. Ke YN, Yang WX. Primary cilium: An elaborate structure that blocks cell division? *Gene.*  
770 2014;547(2):175–85.
- 771 51. WHEATLEY D. Expression of Primary Cilia in Mammalian Cells. *Cell Biol Int.*  
772 1996;20(1):73–81.
- 773 52. Fritz-Laylin LK, Lord SJ, Mullins RD. WASP and SCAR are evolutionarily conserved in  
774 actin-filled pseudopod-based motility. *J Cell Biol.* 2017;216(6):1673–88.
- 775 53. Satir B, Sale WS, Satir P. Membrane renewal after dibucaine deciliation of *Tetrahymena*.  
776 Freeze-fracture technique, cilia, membrane structure. *Exp Cell Res.* 1976;97(1):83–91.
- 777 54. Ishikawa H, Thompson J, Yates JR, Marshall WF. Proteomic analysis of mammalian  
778 primary cilia. *Curr Biol.* 2012;22(5):414–9.
- 779 55. Raychowdhury MK, McLaughlin M, Ramos AJ, Montalbetti N, Bouley R, Ausiello DA,  
780 Cantiello HF. Characterization of Single Channel Currents from Primary Cilia of Renal  
781 Epithelial Cells. *J Biol Chem.* 2005;280(41):34718–22.
- 782 56. Finst RJ, Kim PJ, Griffis ER, Quarmby LM. Fa1p is a 171 kDa protein essential for  
783 axonemal microtubule severing in *Chlamydomonas*. *J Cell Sci.* 2000;113 ( Pt 1):1963–71.
- 784 57. Sharp DJ, Ross JL. Microtubule-severing enzymes at the cutting edge. *J Cell Sci.*  
785 2012;125(11):2561–9.
- 786 58. Matsuo M, Shimodaira T, Kasama T, Hata Y, Echigo A, Okabe M, Arai K, Makino Y,  
787 Niwa S-I, Saya H, Kishimoto T. Katanin p60 contributes to microtubule instability around

- 788 the midbody and facilitates cytokinesis in rat cells. *PLoS One*. 2013;8(11):1–15.
- 789 59. Lohret TA, Zhao L, Quarmby LM. Cloning of *Chlamydomonas* p60 katanin and  
790 localization to the site of outer doublet severing during deflagellation. *Cell Motil*  
791 *Cytoskeleton*. 1999;43(3):221–31.
- 792 60. Rasi MQ, Parker JDK, Feldman JL, Marshall WF, Quarmby LM. Katanin knockdown  
793 supports a role for microtubule severing in release of basal bodies before mitosis in  
794 *Chlamydomonas*. *Mol Biol Cell*. 2009;20(January):379–88.
- 795 61. Sharma N, Bryant J, Wloga D, Donaldson R, Davis RC, Jerka-Dziadosz M, Gaertig J.  
796 Katanin regulates dynamics of microtubules and biogenesis of motile cilia. *J Cell Biol*.  
797 2007;178(6):1065–79.
- 798 62. Sudo H, Baas PW. Acetylation of microtubules influences their sensitivity to severing by  
799 katanin in neurons and fibroblasts. *J Neurosci*. 2010;30(21):7215–26.
- 800 63. Ishikawa H, Marshall WF. Isolation of mammalian primary cilia. 1st ed. Vol. 525,  
801 *Methods in Enzymology*. Elsevier Inc.; 2013. 311-325 p.
- 802 64. Low PS, Lloyd DH, Stein TM, Rogers JAI. Calcium displacement by local anesthetics. *J*  
803 *Biol Chem*. 1979;254(10):4119–25.
- 804 65. Kurebe M. Interaction of dibucaine and calcium ion on a calcium pump reconstituted from  
805 defined components of intestinal brush border. *Mol Pharmacol*. 1977;14:138–44.
- 806 66. Liu C, Hermann TE. Characterization of ionomycin as a calcium ionophore. *J Biol Chem*.  
807 1978;253(17):5892–4.
- 808 67. Jones KT, Sharpe GR. Thapsigargin raises intracellular free calcium levels in human  
809 keratinocytes and inhibits the coordinated expression of differentiation markers. Vol. 210,  
810 *Experimental Cell Research*. 1994. p. 71–6.

- 811 68. Tymianski M, Spigelman I, Zhang L, Carlen PL, Tator CH. Mechanism of action and  
812 persistence of neuroprotection by Ca<sup>2+</sup> chelators. *J Cereb Blood Flow Metab.*  
813 1994;14:911–23.
- 814 69. Lytton J, Westlin M, Hanley MR. Thapsigargin inhibits the sarcoplasmic or endoplasmic  
815 reticulum Ca-ATPase family of calcium pumps. *J Biol Chem.* 1991;266(26):17067–71.
- 816 70. Gadadhar S, Dadi H, Bodakuntla S, Schnitzler A, Bièche I, Rusconi F, Janke C. Tubulin  
817 glycylation controls primary cilia length. *J Cell Biol.* 2017;216(9):2701–13.
- 818 71. O’Hagan R, Silva M, Nguyen KCQ, Zhang W, Bellotti S, Ramadan YH, Hall DH, Barr  
819 MM. Glutamylaton regulates transport, specializes function, and sculpts the structure of  
820 cilia. *Curr Biol.* 2017;27(22):3430–3441.e6.
- 821 72. Wloga D, Joachimiak E, Louka P, Gaertig J. Posttranslational modifications of tubulin and  
822 cilia. *Cold Spring Harb Perspect Biol.* 2016;9(6).
- 823 73. Paridaen JTML, Wilsch-Bräuninger M, Huttner WB. XAsymmetric inheritance of  
824 centrosome-associated primary cilium membrane directs ciliogenesis after cell division.  
825 *Cell.* 2013;155(2):333–44.
- 826 74. Rieder CL, Jensen CG, Jensen LCW. The resorption of primary cilia during mitosis in a  
827 vertebrate (PtK1) cell line. *J Ultrastructure Res.* 1979;68(2):173–85.
- 828 75. Waclawek E, Joachimiak E, Hall MH, Fabczak H, Wloga D. Regulation of katanin  
829 activity in the ciliate *Tetrahymena thermophila*. *Mol Microbiol.* 2017;103(1):134–50.
- 830 76. Ververis A, Christodoulou A, Christoforou M, Kamilari C, Lederer CW, Santama N. A  
831 novel family of katanin-like 2 protein isoforms (KATNAL2), interacting with nucleotide-  
832 binding proteins Nubp1 and Nubp2, are key regulators of different MT-based processes in  
833 mammalian cells. *Cell Mol Life Sci.* 2016;73(1):163–84.

- 834 77. Zhao X, Jin M, Wang M, Sun L, Hong X, Cao Y, Wang C. Fidgetin-like 1 is a  
835 ciliogenesis-inhibitory centrosome protein. *Cell Cycle*. 2016;15(17):2367–75.
- 836 78. Iwaya N, Akiyama K, Goda N, Tenno T, Fujiwara Y, Hamada D, Ikura T, Shirakawa M,  
837 Hiroaki H. Effect of Ca<sup>2+</sup> on the microtubule-severing enzyme p60-katanin. Insight into  
838 the substrate-dependent activation mechanism. *FEBS J*. 2012;279(7):1339–52.
- 839 79. Buljan VA, Graeber MB, Holsinger RMD, Brown D, Hambly BD, Delikatny EJ, Vuletic  
840 VR, Krebs XN, Tomas IB, Bohorquez-Florez JJ, Liu GJ, Banati RB. Calcium–axonemal  
841 microtubuli interactions underlie mechanism(s) of primary cilia morphological changes. *J*  
842 *Biol Phys*. 2017;1–28.
- 843 80. Borghi N, Lowndes M, Maruthamuthu V, Gardel ML, Nelson WJ. Regulation of cell  
844 motile behavior by crosstalk between cadherin- and integrin-mediated adhesions. *Proc*  
845 *Natl Acad Sci*. 2010;107(30):13324–9.
- 846
- 847
- 848
- 849
- 850
- 851
- 852
- 853
- 854
- 855
- 856
- 857
- 858
- 859
- 860
- 861
- 862

863 **Figure 1. Serum stimulation of IMCD3 cells reveals non-canonical ciliary structures.**

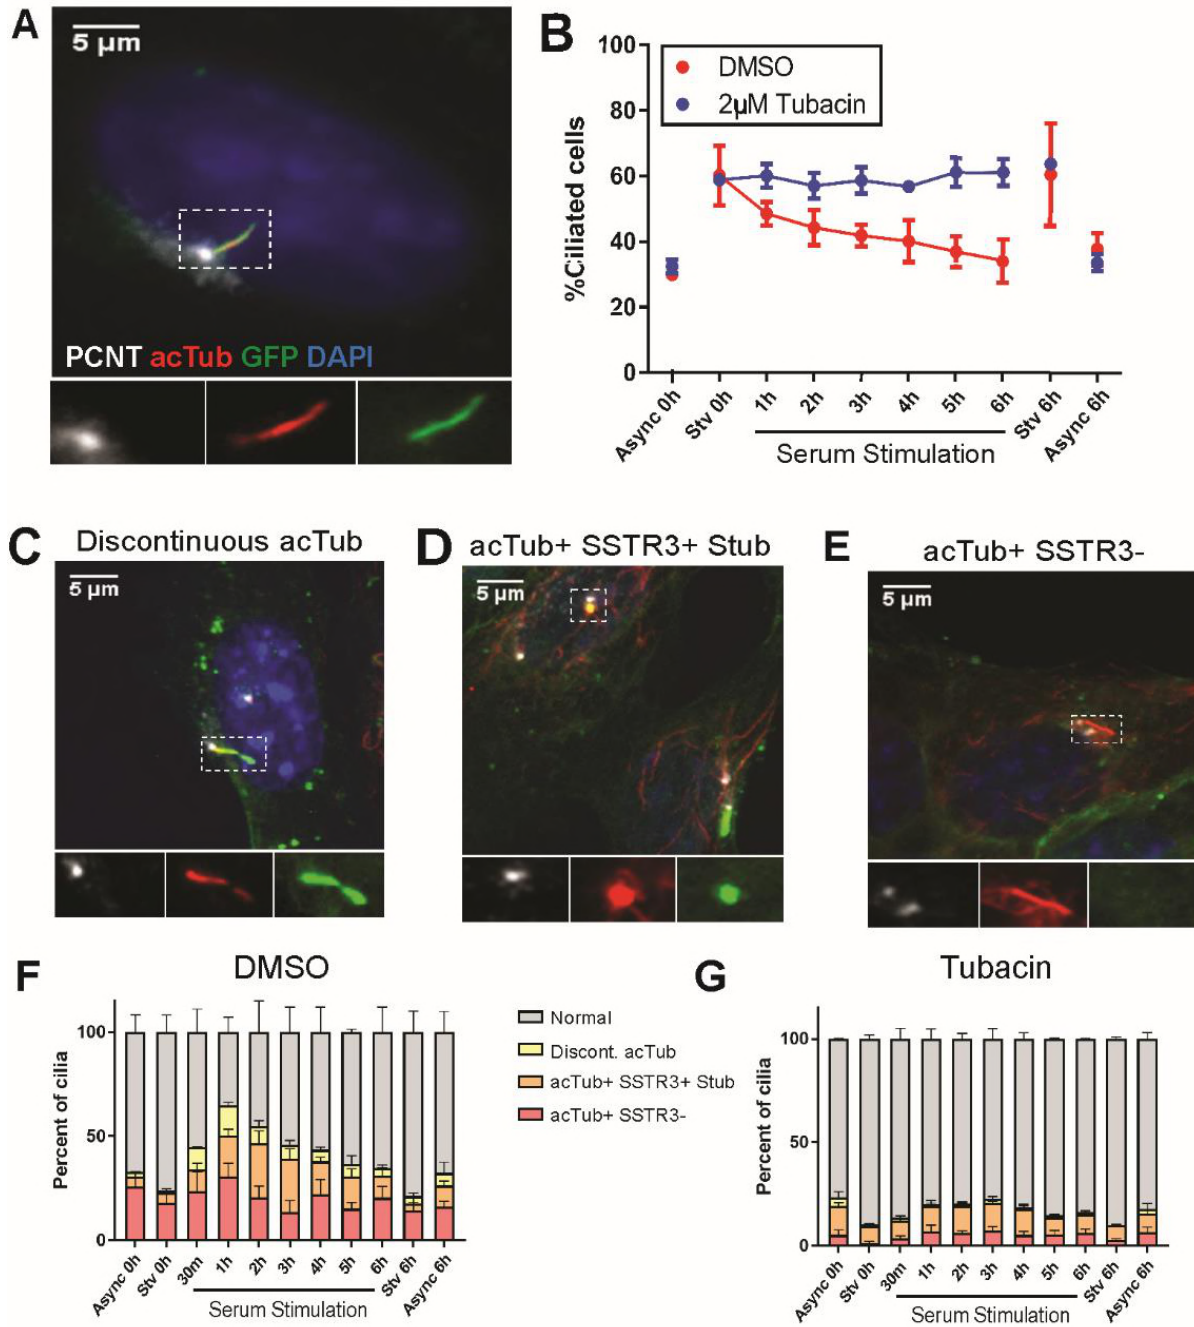

864

865

866

867

868

869

870 **Figure S1. Characterization of immunostained serum stimulated cells.**

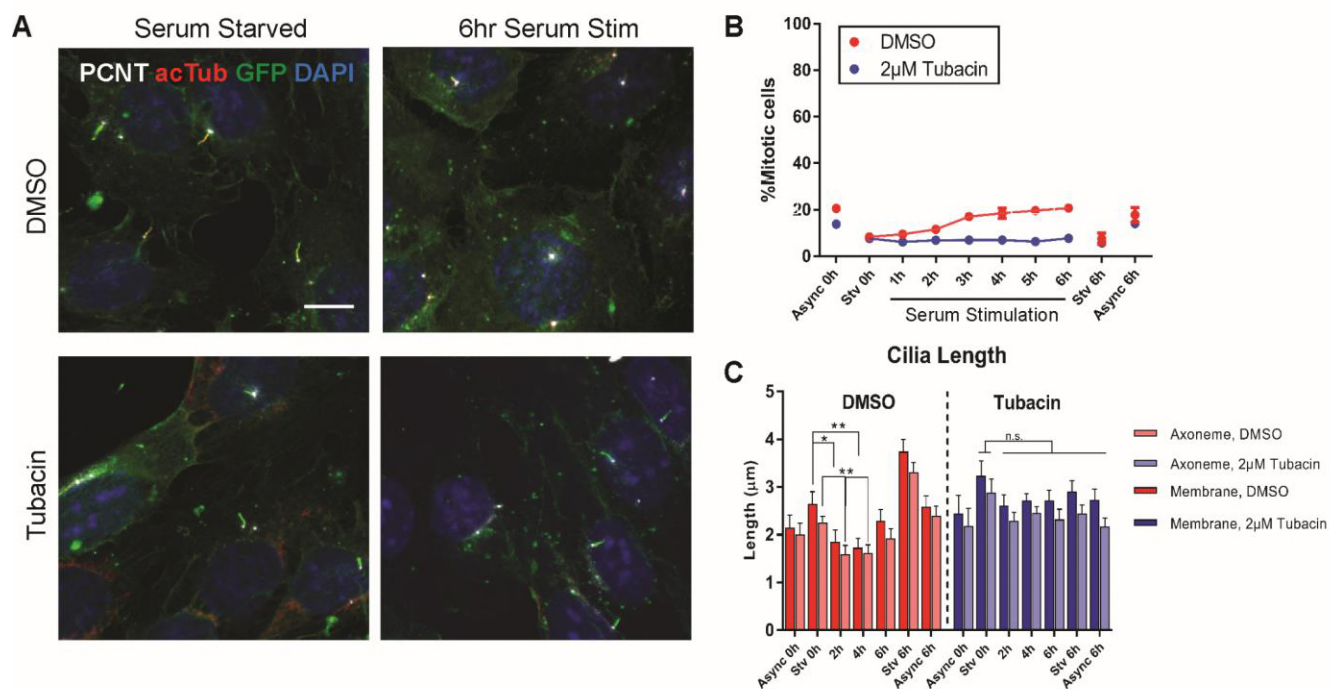

871

872

873

874

875

876

877

878

879

880

881

882

883

884

885

886



887 **Figure 2. Live-cell analysis of cilia disassembly reveal highly heterogeneous dynamics.**

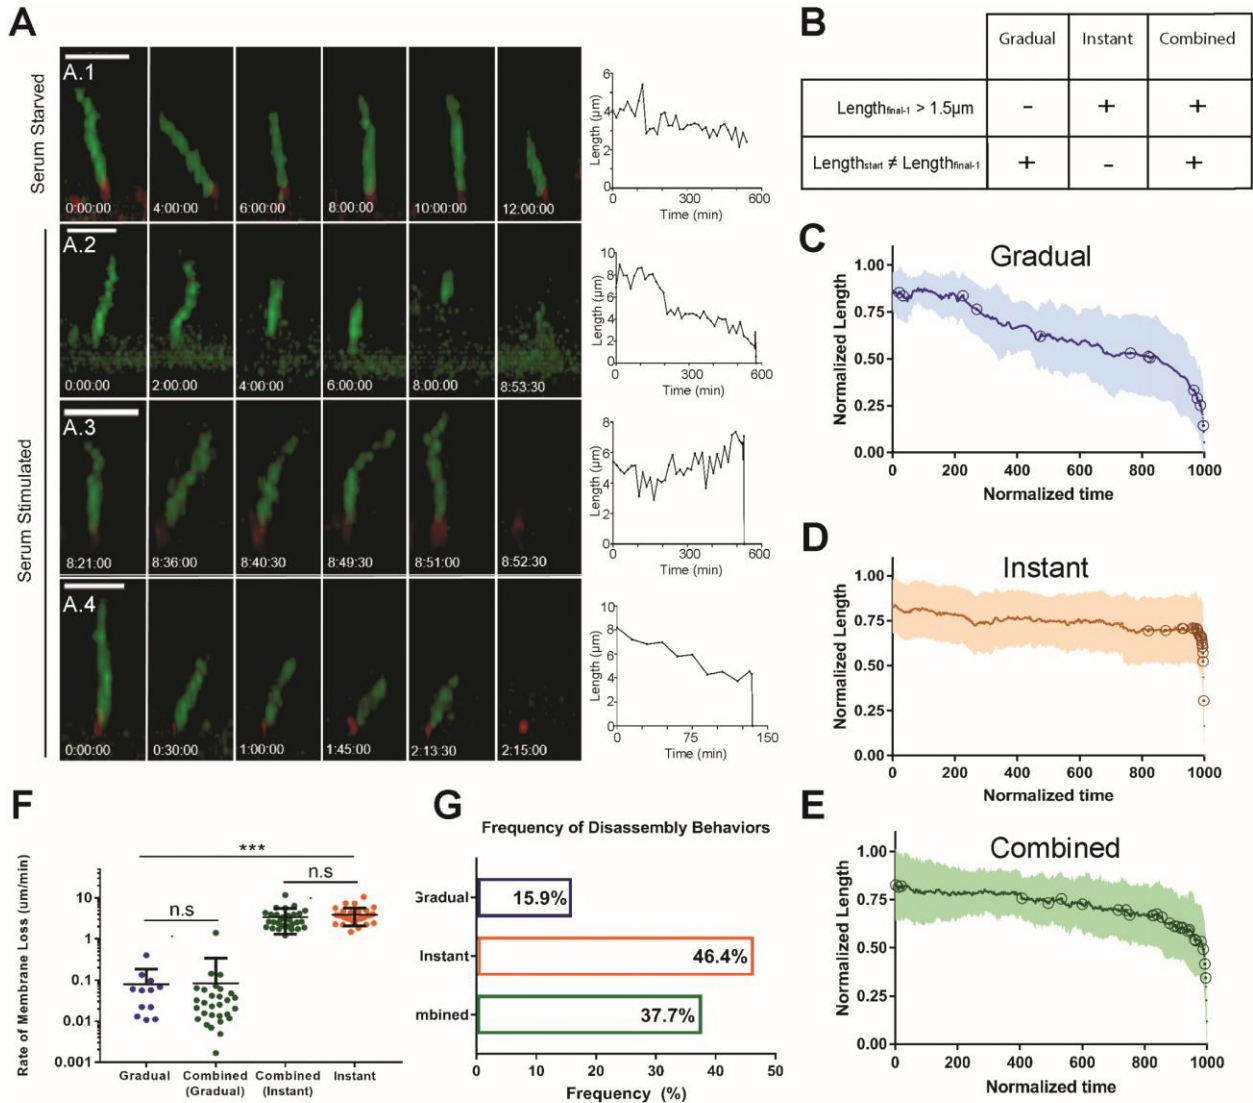

888

889

890

891

892

893

894

895

896 **Figure S2. Manual analysis of ciliary disassembly dynamics.**

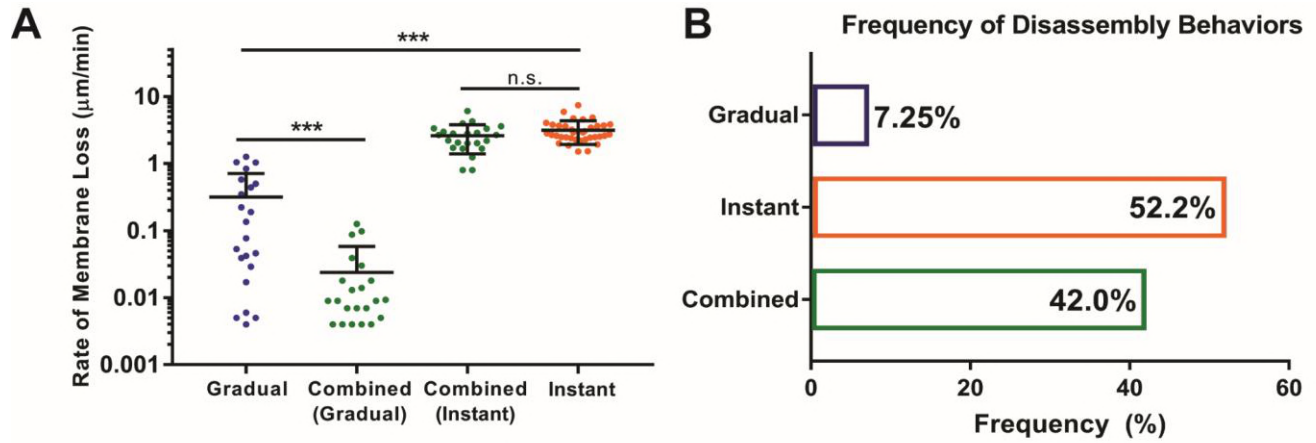

897

898

899

900

901

902

903

904

905

906

907

908

909

910

911

912

913

914 **Figure S3. Schematized workflow for automated analysis of ciliary disassembly dynamics.**

**A** **Analysis of serum starved control cilia (n=10)**

|         | Length change over 12hr | % Change | Range (max-min) | Slope of best fit | Std. Dev. |
|---------|-------------------------|----------|-----------------|-------------------|-----------|
| Max     | 3.164                   | 39%      | 9.193           | -0.00103          | 1.532     |
| Average | 1.255                   | 0.167%   | 6.466           | -0.00463          | 1.116     |

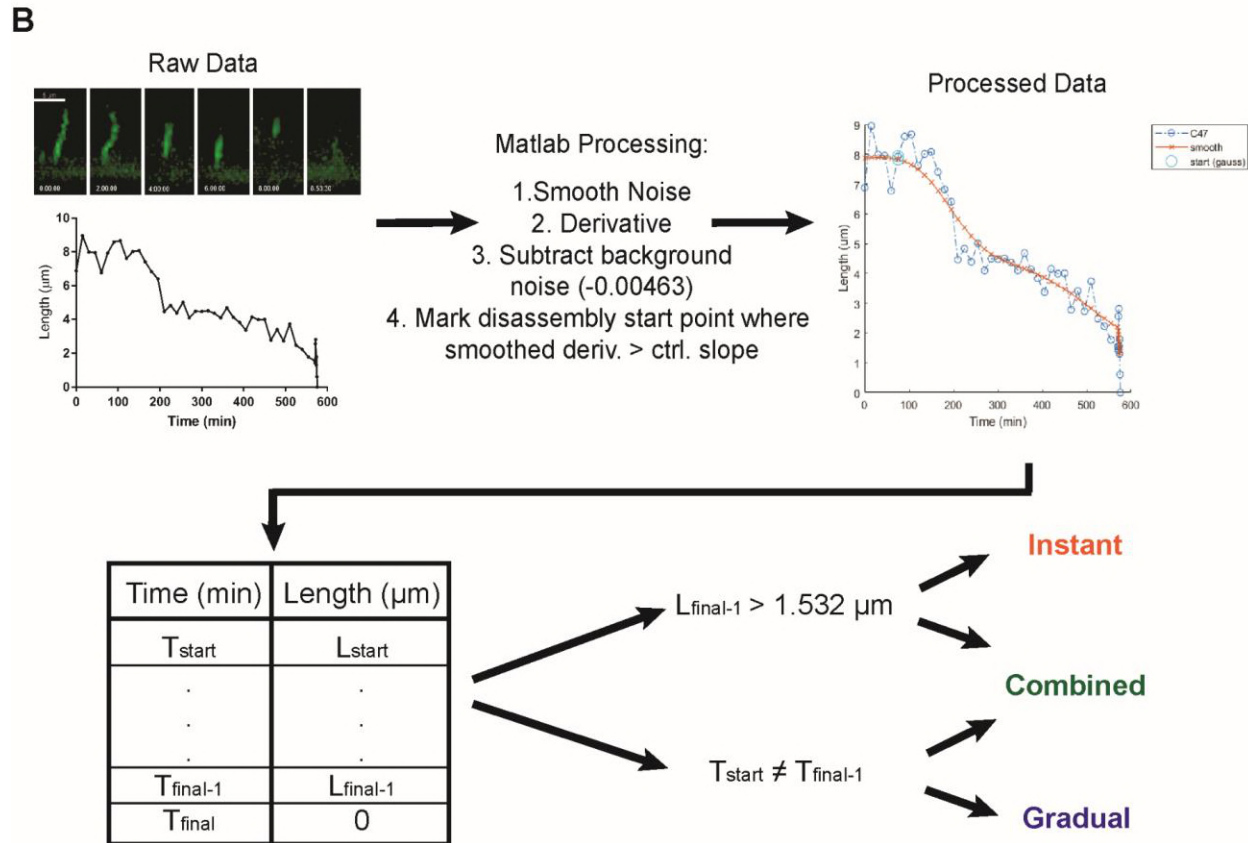

915

916

917

918

919

920

921 **Figure S4. Timing of ciliary disassembly events.**

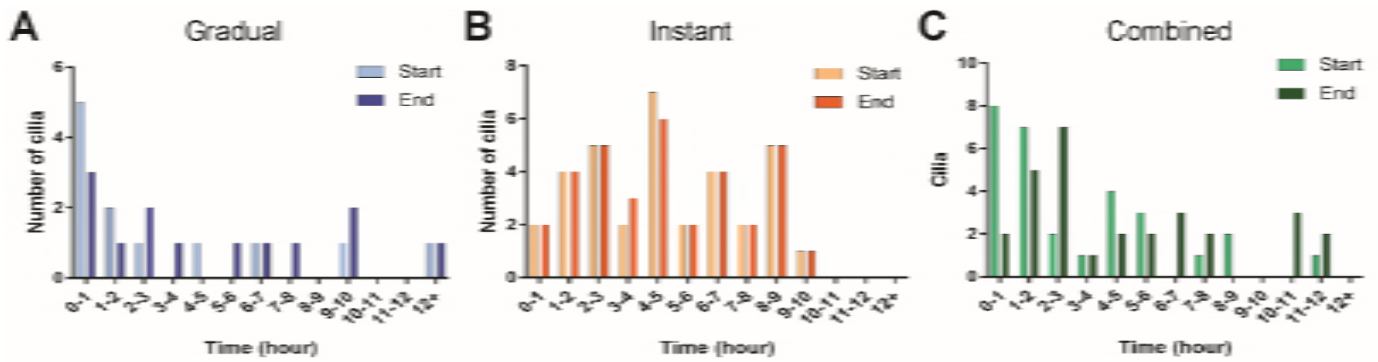

922

923

924

925

926

927

928

929

930

931

932

933

934

935

936

937

938

939

940

941

942

943

944

945

946

947

948

949 **Figure 3. Observation and validation of whole-cilium shedding.**

950

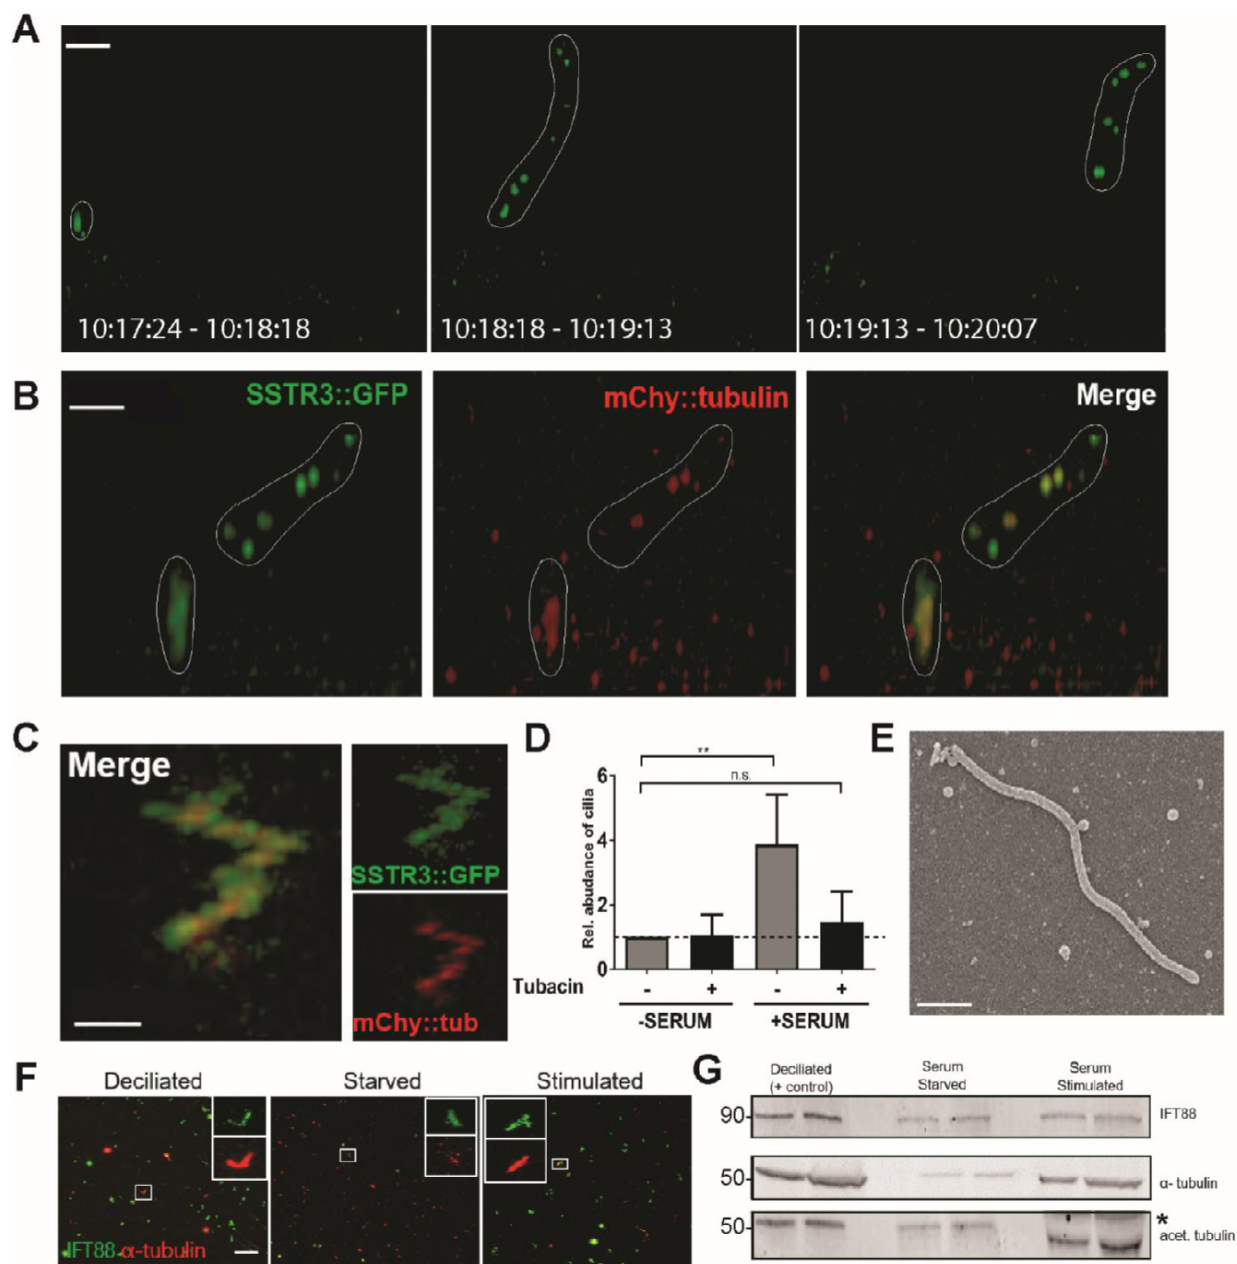

951

952

953

954

955

956

957

958

959

960 **Figure S5. Dynamics of dibucaine-induced ciliary shedding are consistent with serum-**  
961 **induced *instant* disassembly.**  
962

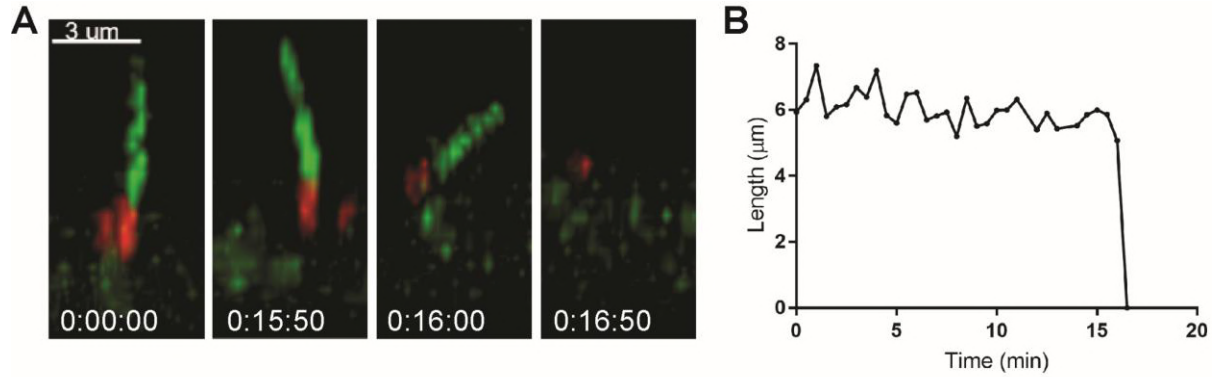

963  
964  
965  
966  
967  
968  
969  
970  
971  
972  
973  
974  
975  
976  
977  
978  
979  
980  
981  
982  
983  
984  
985  
986  
987  
988  
989  
990  
991  
992  
993  
994  
995  
996

997 **Figure S6. Schematics of cilia capture methods.**

998  
999

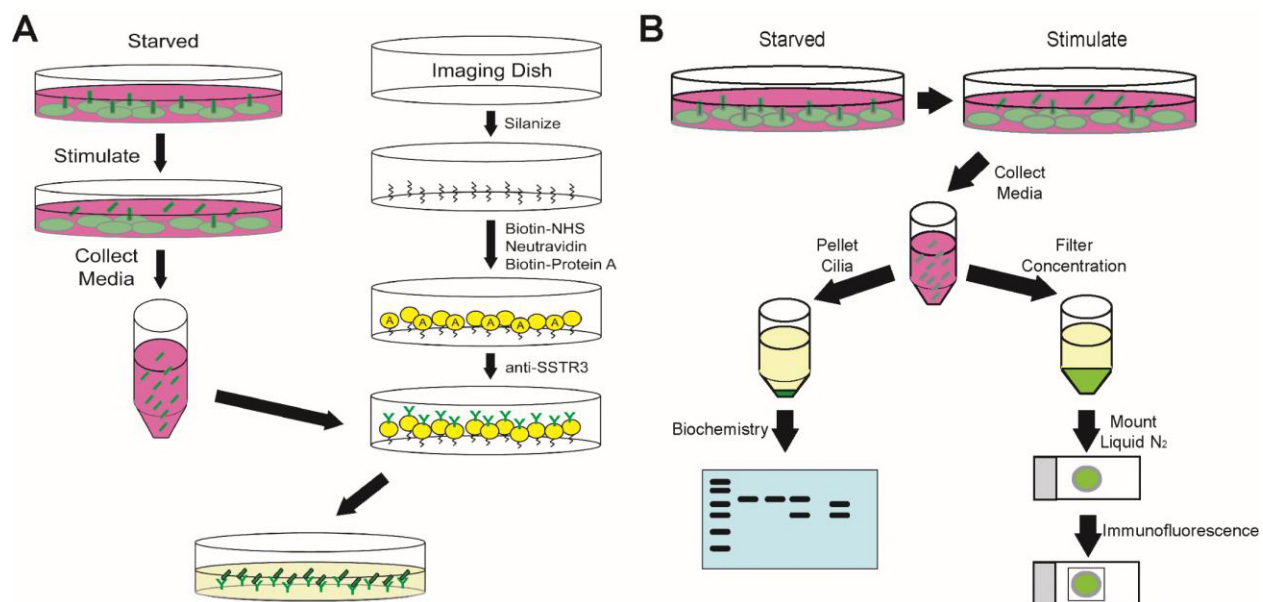

1000

1001

1002

1003

1004

1005

1006

1007

1008

1009

1010

1011

1012

1013

1014

1015

1016

1017

1018

1019

1020

1021

1022

1023

1024

1025

1026 **Figure 4. tRFP-p60 overexpression reduces ciliary length and promotes *instant***  
 1027 **disassembly.**  
 1028

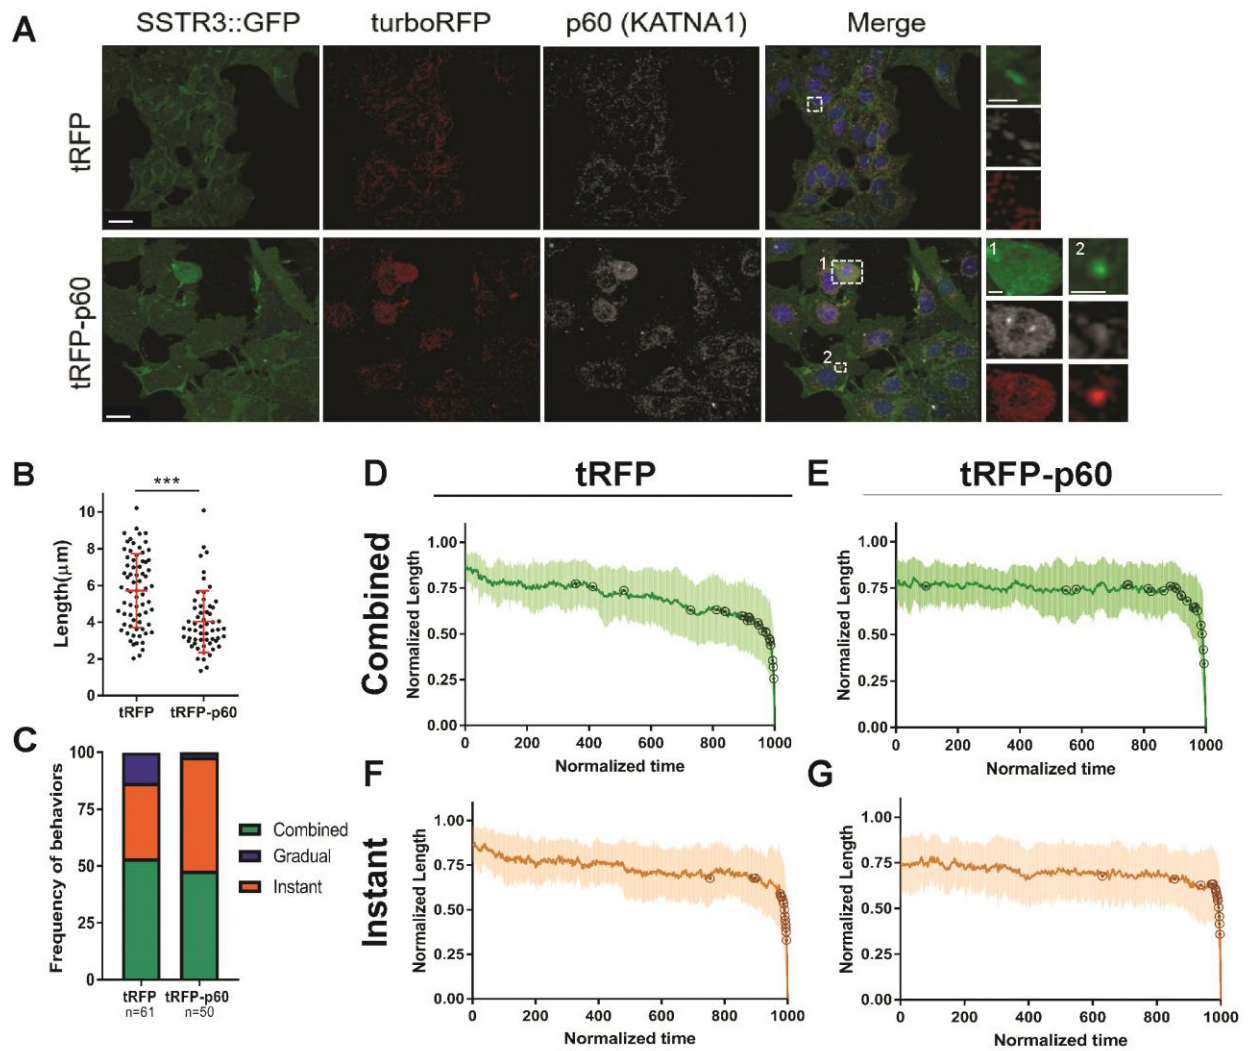

1029  
 1030  
 1031  
 1032  
 1033  
 1034  
 1035  
 1036  
 1037  
 1038  
 1039  
 1040  
 1041  
 1042



1043 **Figure S7. Characterization of tRFP- and tRFP-p60 overexpressing IMCD3-SSTR3::GFP**  
 1044 **cells.**  
 1045

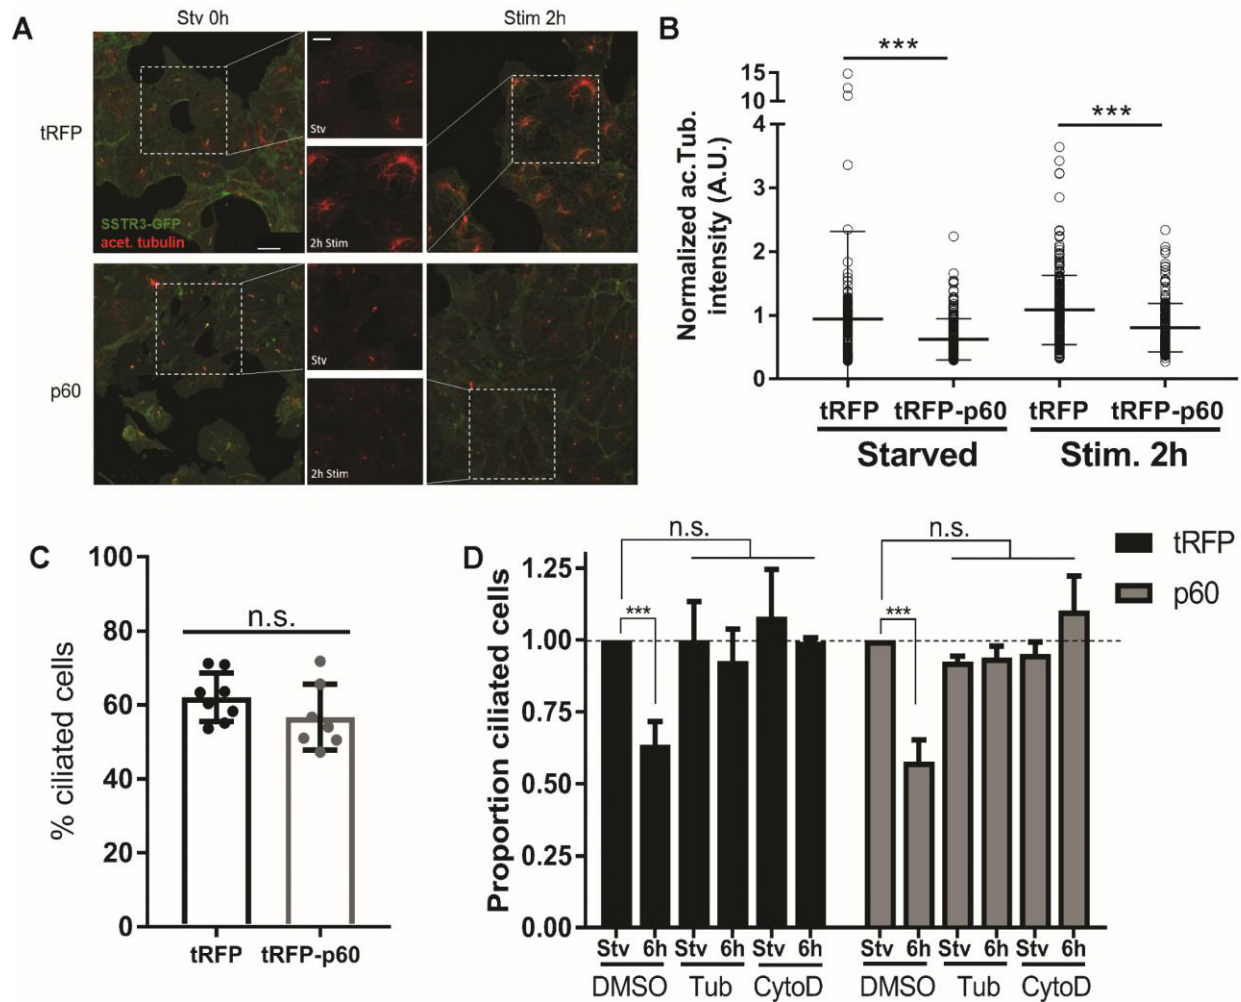

1046

1047 **Figure 5. Effects of calcium-perturbing small molecules on ciliary abundance, length, and**  
 1048 **disassembly.**

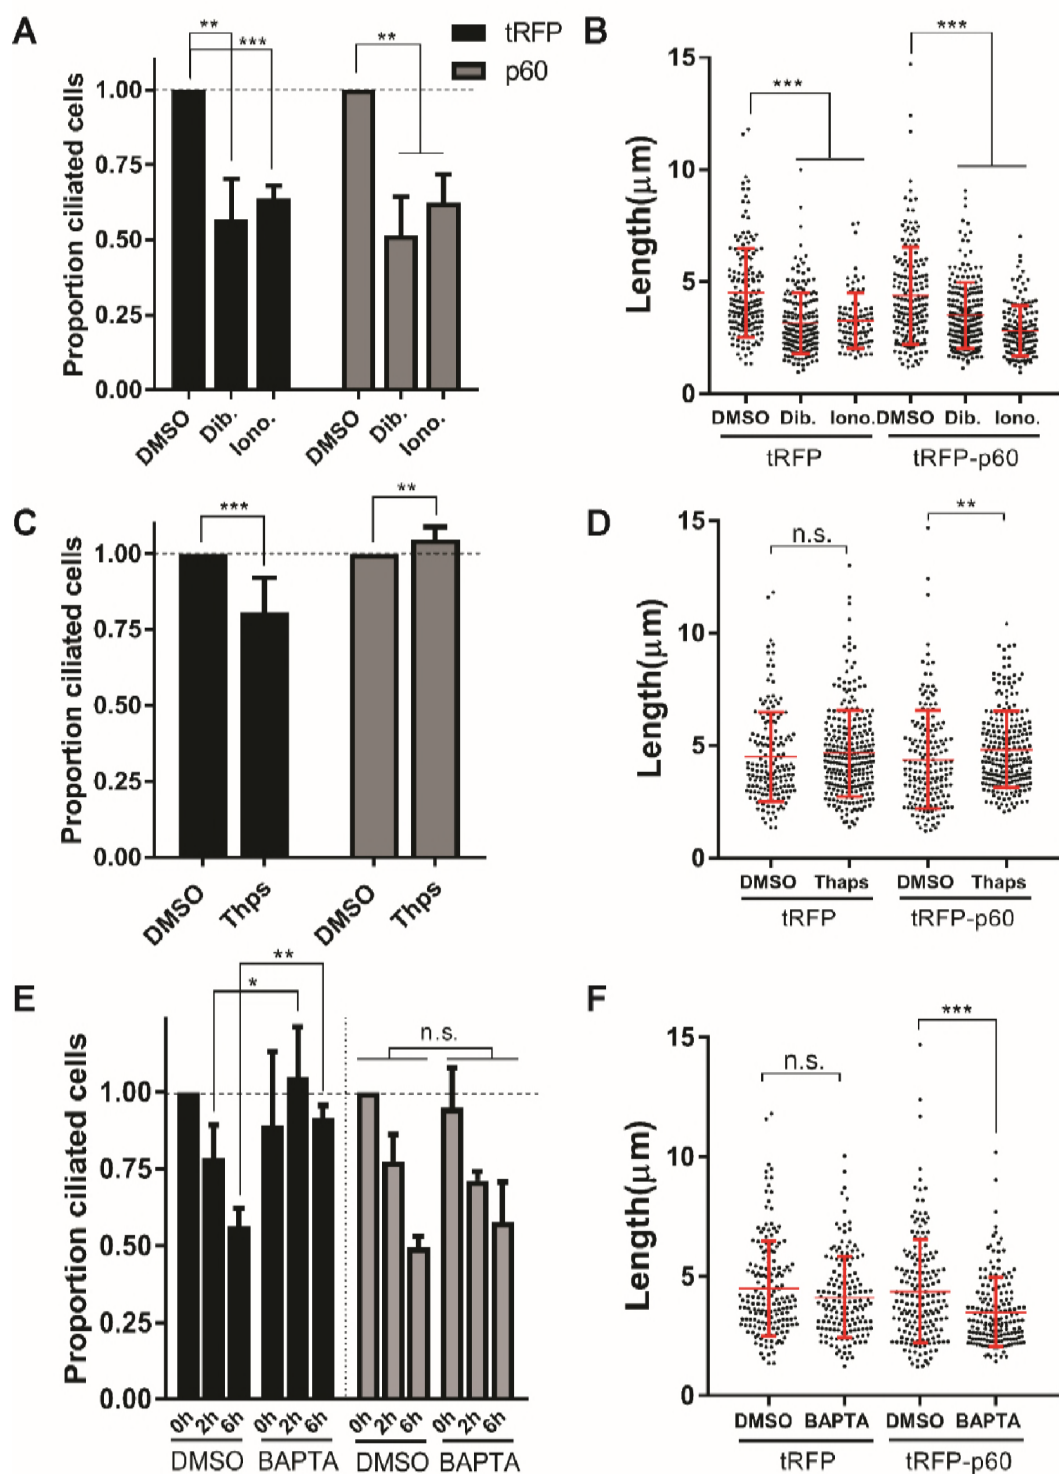

1049  
 1050  
 1051  
 1052

1053 **Figure Legends**

1054

1055 *Figure 1. Serum stimulation of IMCD3 cells reveals non-canonical ciliary structures.* Serum  
1056 starved IMCD3-SSTR3::GFP cells were stimulated with 10% serum in order to synchronize  
1057 ciliary disassembly. A, C-E) Cells were fixed at indicated time points after serum addition and  
1058 immunostained for pericentrin to mark the basal body (PCNT, white) and acetylated tubulin to  
1059 mark the axoneme (acTub, red). A) Morphology of a normal, intact cilium in a starved cell. B)  
1060 The population of ciliated cells quantified over a serum stimulation time course. Asynchronous  
1061 (Async) and serum starved (Stv) controls were included at 0 hr and 6 hr. Cells treated in parallel  
1062 with 2  $\mu$ M tubacin. C-E) Non-canonical ciliary structures identified in serum stimulated cell  
1063 populations. C) Discontinuous acTub staining, in this case accompanied by narrowing of the  
1064 membrane. D) A ciliary stub, marked by punctate acTub and SSTR3 fluorescence. E) Full-length  
1065 axoneme marked by acTub, lacking corresponding SSTR3::GFP signal. F-G) Stacked plots of  
1066 cilia morphologies observed during serum stimulation in (F) DMSO and (G) tubacin-treated  
1067 cells. Quantifications are based on means of 3 independent experiments with 150-200 cells  
1068 analyzed per condition per replicate. Error bars – S.E.M. Statistical significance was assessed by  
1069 unpaired t-test, \* $p < 0.05$ , \*\* $p < 0.01$ , \*\*\* $p < 0.001$ .

1070

1071 *Figure S1. Characterization of immunostained serum stimulated cells.* A) Serum starved and  
1072 stimulated cells were immunostained for pericentrin to mark the basal body (PCNT, white) and  
1073 acetylated tubulin to mark the axoneme (acTub, red). Scale bar, 10  $\mu$ m. B) Serum stimulation is  
1074 accompanied by an increase in mitotic cells, inhibited by tubacin treatment. C) Average ciliary  
1075 length is decreased by in serum stimulated cells, but not in tubacin-treated cells. Length  
1076 measurements were taken in FIJI for ciliary membrane (SSTR3-GFP) and axoneme (acetylated

1077 tubulin). Quantifications are based on means of 3 independent experiments with 150-200 cells  
1078 analyzed per condition per replicate. Error bars – S.E.M.

1079

1080 *Figure 2. Live-cell analysis of cilia disassembly reveal highly heterogeneous dynamics.* A) Still  
1081 images and raw length curves representing dynamics of individual cilia disassembly events.  
1082 Length measurements based on SSTR3::GFP fluorescence. Scale bar 5  $\mu\text{m}$ . A.1) Control serum  
1083 starved cilium measured over 12 hr period undergoes slight length change of 1.66  $\mu\text{m}$  at a rate of  
1084 0.003  $\mu\text{m}/\text{min}$ . A.2) Gradual disassembly with a rate of 0.016  $\mu\text{m}/\text{min}$ . A.3) Instant disassembly,  
1085 with an approximate minimum rate of 4.72  $\mu\text{m}/\text{min}$ . A.4) Combined disassembly, consisting of an  
1086 initial stage of gradual shortening at a rate of 0.029  $\mu\text{m}/\text{min}$ , followed by instant loss at a minimum  
1087 rate of 5.69  $\mu\text{m}/\text{min}$ . B-E) Semi-automated analysis of disassembly events. B) Criteria for defining  
1088 gradual, instant, and combined behaviors. Gradual: Length at next to last time point is significantly  
1089 reduced from starting length. Instant: Length at next to last time point is above 1.5  $\mu\text{m}$  threshold.  
1090 Combined: both gradual and instant criteria are true. C-E) Cumulative normalized length vs. time  
1091 curves for all (C) gradual, (D) instant, and (E) combined disassembly events. Open circles indicate  
1092 individual event start points. F) Disassembly rates between dynamic groups vary by at least 2  
1093 orders of magnitude. Significance was determined by unpaired t-test, \* $p < 0.05$ , \*\* $p < 0.01$ ,  
1094 \*\*\* $p < 0.001$ . Error bars – S.D. H) Relative frequency of disassembly behaviors (n=70 from at least  
1095 10 independent experiments).

1096

1097 *Figure S2. Manual analysis of ciliary disassembly dynamics.* Raw length measurements were  
1098 taken in Imaris and disassembly start points were judged by manual inspection. A) Rates of  
1099 disassembly were calculated as change in length divided by duration of event. Statistical

1100 significance was determined by unpaired Student's t-test. B) Frequency of disassembly behaviors  
1101 ( $n = 70$  from at least 10 independent experiments).

1102

1103 *Figure S3. Schematized workflow for automated analysis of ciliary disassembly dynamics.* A) 10  
1104 control non-disassembling cilia from starved cells were imaged at 90-sec intervals over a 12 hr  
1105 period and analyzed. Cumulative metrics are shown here. Slight changes in length and stochastic  
1106 length fluctuations are inherently present, and used as a baseline for analysis of disassembling  
1107 cilia. Marked in yellow – maximum standard deviation of length is used as a proxy for length  
1108 measurement error, and is thus used as a threshold length for instant disassembly; average slope  
1109 of best fit line represents background decline in length over 12 hr imaging period. B) Matlab  
1110 workflow. Scale bar, 5  $\mu\text{m}$ . Raw data are run through a smoothing function. Derivatives are  
1111 calculated, then normalized to background reduction (A) to identify start point of disassembly  
1112 event. Lastly, disassembly behaviors (gradual, instant, and combined) are assigned as described in  
1113 the text.

1114

1115 *Figure S4. Timing of ciliary disassembly events.* Histograms of A) gradual, B) instant, and C)  
1116 combined disassembly events show frequency of disassembly start (light bars) and end (dark bars)  
1117 points, binned by time post-serum stimulation.

1118

1119 *Figure 3. Observation and validation of whole-cilium shedding.* A) Serum stimulated cell, imaged  
1120 at 54-second intervals. A short ciliary membrane is visibly shed from the cell surface. Shed cilium  
1121 (in white outline) appears as a group of punctate fragments co-migrating due to high velocity of  
1122 motion compared to speed of stack acquisition. Scale bar, 5  $\mu\text{m}$ . B) Partial ciliary shedding in

1123 IMCD3-SSTR3::GFP cells transiently expressing mCherry- $\alpha$ -tubulin, imaged at 30 s-intervals.  
1124 Intact and shed portions of the cilium are demarcated with a white outline. Tubulin is visible in  
1125 shed fragments. Scale bar, 3  $\mu$ m. C-E) Ciliary immune-capture. Serum stimulation media were  
1126 incubated on immobilized anti-SSTR3 antibody. Isolated cilia were observed by C-D) confocal  
1127 fluorescent microscopy (scale bar, 2  $\mu$ m) and E) SEM. Scale bar, 500nm. C-D) Immune-captured  
1128 cilium from IMCD3-SSTR3::GFP cells transfected with mCherry- $\alpha$ -tubulin. D) Normalized  
1129 quantification of (C), defined as elongated SSTR3+ objects at least 1.5  $\mu$ m in length. Tubacin  
1130 treatment reduces the prevalence of captured cilia. F-G) Filter-spin concentration of shed cilia.  
1131 Serum stimulation media from IMCD3 cells with no endogenous fluorescence was concentrated  
1132 either by (F) vacuum & centrifugation filtration for immunofluorescence or (G) centrifugation  
1133 pelleting for subsequent Western blot. Media from artificially deciliated cells were included as a  
1134 positive control. F) Filtration-concentrated samples were processed for immunofluorescence  
1135 against IFT88 and  $\alpha$ -tubulin. Scale bar, 20  $\mu$ m. Representative insets show full-length cilia:  
1136 6.82 $\mu$ m (deciliated), 5.94 $\mu$ m (starved), and 6.10 $\mu$ m (stimulated). G) Western blot of concentrated  
1137 material shows presence of ciliary markers at expected molecular weights:  $\alpha$ -tubulin & acetylated  
1138 tubulin. Molecular weights are indicated (kDa). Asterisk (\*) denotes position of a large BSA band  
1139 present in samples derived from serum-containing medium. Two technical replicates per condition  
1140 are shown as side-by-side bands.

1141

1142 *Figure S5. Dynamics of dibucaine-induced ciliary shedding are consistent with serum-induced*  
1143 *instant disassembly.* Starved cells were treated with 190  $\mu$ m dibucaine and imaged by confocal  
1144 microscopy at 30 sec intervals. A) Still images from a representative ciliary shedding show

1145 complete ciliary loss in under 30 sec. B) Length measurements from A) show instant  
1146 disassembly dynamics.

1147

1148 *Figure S6. Schematics of cilia capture methods.* A) Immune-capture of shed cilia. Medium from  
1149 serum stimulated cells is incubated on an imaging dish bearing immobilized antibody against the  
1150 SSTR3 membrane marker. B) Filter-spin concentration of shed cilia. Medium from serum-  
1151 stimulated cells is concentrated either by centrifugation pelleting for subsequent Western blot or  
1152 by vacuum & centrifugation filtration for immunofluorescence. Medium from cells subjected to  
1153 artificial deciliation was included as a positive control.

1154

1155 *Figure 4. tRFP-p60 overexpression reduces ciliary length and promotes instant disassembly.*  
1156 IMCD3-SSTR3::GFP cells stably expressing turboRFP (tRFP) alone or tRFP-p60 fusion. A)  
1157 tRFP and p60 cells were starved, fixed, and stained with a polyclonal antibody against p60.  
1158 tRFP-p60 and p60 antibody label spindle poles (inset 1) and cilia (inset 2) in some cells. Scale  
1159 bars, 20  $\mu\text{m}$ . Inset scale bars, 5  $\mu\text{m}$ . B) Cilia lengths measured from confocal stacks of live cells.  
1160 Data pooled from at least 3 independent experiments, at least 50 cilia measured per experiment.  
1161 Statistical significance from Mann-Whitney U test. B-G) Live-cell cilia disassembly dynamics.  
1162 B) Relative frequencies of gradual, instant, and combined dynamic behaviors in tRFP and tRFP-  
1163 p60 cells. Number of events analyzed is shown for each condition, each from at least 4  
1164 independent experiments. D-G) Normalized average combined and instant disassembly plots  
1165 with S.D. Gradual disassembly was excluded due to low incidence. Normalized individual  
1166 disassembly start points are overlaid (circled points).

1167

1168 *Figure S7. Characteriation of tRFP- and tRFP-p60 overexpressing IMCD3-SSTR3::GFP cells.*  
1169 A) Starved and 2 hr-stimulated tRFP and tRFP-p60 cells were fixed and stained for acetylated  
1170 tubulin (red, center column). Scale bar, 20  $\mu\text{m}$ . Insets show acTub channel alone. Inset scale bar,  
1171 10  $\mu\text{m}$ . B) Quantification of A). Mean cellular acTub intensity was normalized to cellular tRFP  
1172 intensity. Data pooled from 3 independent experiments, 80-100 cells per condition. Statistical  
1173 significance from Mann-Whitney U test. C) Percent ciliation calculated from fixed starved tRFP  
1174 and tRFP-p60 cells. Data from at least 7 independent experiments. D) Cells pre-treated with  
1175 DMSO, 2  $\mu\text{M}$  Tubacin, or 1  $\mu\text{M}$  CytoD were starved and stimulated (6 hr). Proportion of ciliated  
1176 cells was calculated by normalizing to Starved + DMSO for each cell line (dotted line). N = 3  
1177 experiments.

1178  
1179 *Figure 5. Effects of calcium-perturbing small molecules on ciliary abundance, length, and*  
1180 *disassembly.* Cilia counts are from fixed populations and normalized to respective DMSO  
1181 controls. Length measurements are from live cells. A-B) tRFP and p60 cells were starved and  
1182 pre-treated with DMSO, Dib. – 190  $\mu\text{M}$  dibucaine (30 min), Iono. – 1  $\mu\text{M}$  ionomycin (30 min),  
1183 C-D) Thps – 5  $\mu\text{M}$  thapsigargin (1 hr), or E-F) 1  $\mu\text{M}$  BAPTA-AM (30 min). E) BAPTA-AM  
1184 treated cells were subjected to serum stimulation, fixed and analyzed at indicated points. Data  
1185 from 3 independent experiments, at least 100 cells counted per condition. Statistical significance  
1186 was determined by unpaired t-test.

1187  
1188  
1189  
1190  
1191  
1192



1193 **Supplementary Videos.**

1194 **Video S1.** *Primary cilium of a serum starved cell.* Imaged at 90 second intervals over 12 hrs,  
1195 45fps. The cilium undergoes rapid length fluctuations and a slight overall reduction in length at  
1196 0.003  $\mu\text{m}/\text{min}$ . See Fig. 2A.1.

1197

1198 **Video S2.** *Primary cilium disassembling by gradual dynamics.* Imaged at 90 second intervals,  
1199 45fps. Cilium disassembles with an overall rate of 0.016 $\mu\text{m}/\text{min}$ . See Fig. 2A.2.

1200

1201 **Video S3.** *Primary cilium disassembling by instant dynamics.* Imaged at 90 second intervals,  
1202 15fps. Cilium is lost in under 90 seconds, approximate minimum rate of 4.72 $\mu\text{m}/\text{min}$ . See Fig.  
1203 2A.3.

1204

1205 **Video S4.** *Primary cilium disassembling by combined dynamics.* Imaged at 46 second intervals,  
1206 25fps. Cilium undergoes gradual shortening (0.029 $\mu\text{m}/\text{min}$ ), followed by instant loss  
1207 (>5.69 $\mu\text{m}/\text{min}$ ). See Fig. 2A.4.

1208

1209 **Video S5.** *Primary cilium shedding.* Imaged at 54 second intervals. Ciliary membrane is released  
1210 from cell surface (27:12-29:00). See Fig. 3A.

1211

1212
